# Supplementary material for: Fast synthesis of DNA origami single crystals at room temperature
Source: Royal Society of Chemistry journal article supplement (doi:10.1039/d4sc07267g), 2024-12-04
Supplement: d4sc07267g1.pdf [file d4sc07267g1.pdf]

## Supplementary information

### Fast synthesis of DNA origami single crystals at room temperature

*Yifan Yu<sup>1</sup>, Min Ji<sup>1</sup>, Yong Wang<sup>1</sup>, Xuehui Yan<sup>1</sup>, Lizhi Dai<sup>1</sup>, Ningning Ma<sup>1</sup>, Zhaoyu Zhou<sup>1</sup>, Hang Xing<sup>2</sup>, Ye Tian<sup>1\*</sup>*

<sup>1</sup>College of Engineering and Applied Sciences, State Key Laboratory of Analytical Chemistry for Life Science, National Laboratory of Solid State Microstructures, Jiangsu Key Laboratory of Artificial Functional Materials, Chemistry and Biomedicine Innovation Center, Collaborative Innovation Center of Advanced Microstructures, Nanjing University, Nanjing 210023, China;

<sup>2</sup>Institute of Chemical Biology and Nanomedicine, State Key Laboratory of Chemo/Biosensing and Chemometrics, Hunan Provincial Key Laboratory of Biomacromolecular Chemical Biology, College of Chemistry and Chemical Engineering, Hunan University, Changsha 410082, China

\*Correspondence: [ytian@nju.edu.cn](mailto:ytian@nju.edu.cn);

## **Table of Contents**

### **Section 1. Experimental Materials and Methods**

- a. DNA functionalization of gold nanoparticles**
- b. Design and synthesis of regular-octahedral DNA origami frames**
- c. Encaging functionalized gold nanoparticles inside DNA origami frames**
- d. Fabrication of DNA origami single crystals at room temperature**
- e. Fabrication of DNA origami single crystals at outdoor temperature**
- f. Linear fitting of  $T_m$  variation curve with urea concentration**
- g. Silica-coated DNA origami crystals.**

### **Section 2. Electron Microscopy and Confocal Laser Scanning Microscope**

- a. Sample preparation and transmission electron microscope (TEM)**
- b. Sample preparation and scanning electron microscope (SEM)**
- c. Sample preparation and confocal laser scanning microscope (CLSM)**

### **Section 3. Small Angle X-ray Scattering (SAXS)**

- a. Experimental method and data analysis**

### **Section 4. Supplementary Figures**

### **Section 5. DNA Sequence**

- a. Staples of regular-octahedral DNA origami frames (PAGE purified)**
- b. Sticky ends of regular-octahedral DNA origami frames (ULTRAPAGE purified)**
- c. Inner strands of regular-octahedral DNA origami frames (ULTRAPAGE purified)**
- d. Thiolated DNA for AuNPs function (HPLC purified)**
- e. Sticky ends of regular-octahedral DNA origami frames-universality verification-1<sup>st</sup> system**
- f. Staples of elongated-octahedral DNA origami frames-universality verification-2<sup>nd</sup> system**
- g. Inner strands of elongated-octahedral DNA origami frames-universality verification-2<sup>nd</sup> system**

**h. Sticky ends of elongated-octahedral DNA origami frames-universality verification-2<sup>nd</sup> system**

**i. Sticky ends with hairpin DNA conformation of regular-octahedral DNA origami frames-universality verification-3<sup>rd</sup> system (ULTRAPAGE purified)**

## **Section 6. Supplementary References**

## **Section 1. Experimental Materials and Methods**

### **a. DNA functionalization of gold nanoparticles**

The thiol-modified single-strand DNA (ssDNA) sequences were purchased from Shanghai Sangon Biotech Co. Ltd, and the 10 nm gold nanoparticles were purchased from Ted Pella Inc. Prior to modifying the thiol-modified ssDNA on the surface of nanoparticles, we first reduced the thiol-modified ssDNA using TCEP (tris[2-carboxyethyl] phosphine) in an ice bath for 1.5 hour and then purified it using a size exclusion column (G-25, GE Healthcare). Then, we mixed the 10 nm gold nanoparticles with the purified ssDNA at a molar ratio of 1:300 and adjusted the phosphate buffer concentration in solution to 10 mM (pH = 7). The mixed solution was firstly rotated on a rotator for 1.5 hour. Afterward, we gradually introduced NaCl solution (2 M NaCl, 10 mM phosphate) into the mixture in batches until the final NaCl concentration reached 0.1 M. The mixed solution was then rotated on the rotator for 18 hours. After that, we removed excess reduced thiol-modified ssDNA from the mixed solution by centrifugation at 14500 rpm for 1 hour, and replaced the supernatant with buffer (10 mM phosphate, 0.1 M NaCl), repeating this centrifugation and replacement operation three times. The functionalized gold nanoparticles were stored in the refrigerator at 4 °C.

### **b. Design and synthesis of regular-octahedral DNA origami frames**

Regular-octahedral DNA origami frame contained twelve edges, and each edge was composed of a 6-helix bundle (6HB) that had a length of 84 base pairs (~28.56 nm). Detailed design and synthesis process can be found in previous literature<sup>1</sup>. To synthesize the regular-octahedral DNA origami frames, we mixed M13mp18 scaffold DNA (Bayou Biolabs, LLC), DNA staples, sticky ends, and inner strands at a molar ratio of 1:10:10:7.5 in the buffer solution containing 1 mM EDTA, 12.5 mM magnesium acetate and 40 mM tris acetate. Thus, the final solution was composed of 10 nM M13mp18 scaffold DNA, 100 nM DNA staples, 100 nM sticky ends and 75 nM inner strands. This solution was firstly heated to 90 °C and then slowly cooled to room temperature over a period of approximately 23 hours. The synthesized regular-octahedral DNA origami frames were stored at room temperature.

### **c. Encaging functionalized gold nanoparticles inside DNA origami frames**

The synthesized regular-octahedral DNA origami frames were firstly mixed with functionalized 10 nm gold nanoparticles at a molar ratio of 1:0.9. Then, the mixed solution was heated to 50 °C and slowly cooled to 20 °C at the rate of 2.4 °C /h, resulting in an efficiency of nearly 99.0% for loading the nanoparticles (Fig. S1b). The DNA origami frames encaged with functionalized gold nanoparticles were uniformly called DNA origami building blocks in this work.

#### **d. Fabrication of DNA origami single crystals at room temperature**

Firstly, we mixed two types of DNA origami building blocks at a molar ratio of 1:1, and then use urea solution (9.85 M urea, 1 mM EDTA, 12.5 mM magnesium acetate, 40 mM tris acetate) to adjust the urea concentration of the mixture to our requirement. The required urea concentration was determined based on the fitting curve of  $T_m$  (we firstly queried the room temperature from the thermometer, and then regarded this temperature as  $T_m$  to calculate the required urea concentration). The mixture was placed directly at room temperature for incubation. During the incubation, no any other operations were required. After the incubation, we used the urea-free buffer (1 mM EDTA, 12.5 mM magnesium acetate and 40 mM tris acetate) to replace the supernatant, and stored the samples at 4 °C.

#### **e. Fabrication of DNA origami single crystals at outdoor temperature**

Firstly, we mixed two types of DNA origami building blocks at a molar ratio of 1:1, and then use urea solution (9.85 M urea, 1 mM EDTA, 12.5 mM magnesium acetate, 40 mM tris acetate) to adjust the urea concentration of the mixture to our requirement. The required urea concentration was determined based on the fitting curve of  $T_m$  (we firstly queried the temperature fluctuations in the next two days from the weather forecast and determined the average temperature, and then regarded this average temperature as  $T_m$  to calculate the required urea concentration). The mixture was placed directly at outdoor temperature for incubation. During the incubation, no any other operations were required. After the incubation, we used the urea-free buffer (1 mM EDTA, 12.5 mM magnesium acetate and 40 mM tris acetate) to replace the supernatant, and stored the samples at 4 °C.

#### **f. Linear fitting of $T_m$ variation curve with urea concentration**

We used the linear equation to fit the curve of  $T_m$  changing with urea concentration, and the fitting formula is:

$$T_m = 40.8\text{ }^\circ\text{C} + 1.464\text{ }^\circ\text{C}/M \times C_{\text{urea}}$$

where  $T_m$  is the melting temperature,  $C_{\text{urea}}$  is the urea concentration, and  $40.8\text{ }^\circ\text{C}$  is the original  $T_m$  of the system without urea. The  $R^2$  of this fitting curve is 0.997, confirming the fine fitting. This fitting curve can be used to calculate the required urea concentration for the crystallization of DNA building blocks in a specific environment by substituting the temperature parameters into  $T_m$  (for room temperature: taking the current temperature; for outdoor temperature: taking the average temperature).

#### **g. Silica-coated DNA origami crystals**

To intuitively observe the morphology and packing modes of the assemblies, we had to remove them from the salt solution and expose them to high-energy electron beam irradiation that unfortunately would cause the collapse of structure. Therefore, we encapsulated the bundles of regular-octahedral DNA origami frames and the connection part by a thin layer of silica to preserve their structural integrity. This silica-coated approach was referring to previous work<sup>2</sup>. Firstly, we diluted the concentration of magnesium ion in the solution to 7 mM, followed by adding 0.5-0.8  $\mu\text{L}$  TMAPS (N-trimethoxysilylpropyl-N, N, N-trimethylammonium chloride) at room temperature. Then, this mixture was shaken for 20 minutes at 400 rpm, added 0.4-0.7  $\mu\text{L}$  TEOS (tetraethyl orthosilicate), shaken for another 30 minutes at 500 rpm. Finally, after holding overnight, we replaced the supernatant of the sample with deionized water to interrupt the encapsulation process. The silica-coated samples were stored at room temperature.

## **Section 2. Electron Microscopy and Confocal Laser Scanning Microscope**

### **a. Sample preparation and transmission electron microscope (TEM)**

The carbon-coated grids were firstly discharged in a 0.26 mbar air atmosphere for 30 seconds using PELCO easiGlow (Ted Pella, Inc.). After shaking the sample solution evenly, 5  $\mu$ L solution was dropped onto this discharged carbon-coated grid. Five minutes later, residual solution was removed from the grid by filter papers, and then 5  $\mu$ l deionized water was dropped and removed immediately by filter papers to dissolve the deposited salt. This process was repeated twice. Next, 5  $\mu$ L 2% (w/v) uranyl acetate solution was dropped onto the grid to stain the sample for 10 seconds, and then removed by filter papers. This grid was then held to air dry for several minutes. The prepared carbon-coated grids covered by samples were then observed using JEOL JEM-1400 operated at 120 kV.

### **b. Sample preparation and scanning electron microscope (SEM)**

The silica-coated samples were shaken evenly and then 5  $\mu$ L solution was taken out to be dropped onto the alcohol-washed silicon slice. To accelerate the drying process, we baked the droplet under infrared light until it was completely dry. This silicon slice was glued to the SEM sample stage using copper conductive tape without any metal deposition. The prepared samples were then observed using HITACHI Regulus 8100 operated at 1.5 kV with current of 2  $\mu$ A.

### **c. Sample preparation and confocal laser scanning microscope (CLSM)**

Firstly, we shook the samples evenly, and then extracted 2  $\mu$ L mixture to drop into a confocal dish. This dish was then placed onto the sample stage of CLSM (Leica TCS SP8 STED) for subsequent observation. For higher image resolution, we utilized the bright field mode of CLSM (Leica TCS SP8 STED) to observe the mesoscopic morphology of our samples. The crystals did not exhibit their true colors under CLSM which highlighted the contrast, because the imaging principles was different from that of the ordinary optical microscope which can retain the authentic color (dark red) of the samples. However, this did not affect our data collection as we required the size and shape information of samples, and the advantages of CLSM was that it could help us to obtain data with more accurate size.

### Section 3. Small Angle X-ray Scattering (SAXS)

#### a. Experimental method and data analysis

The SAXS experiments were carried out at the BL19U2 beamline at Shanghai Synchrotron Radiation Facility (SSRF). Before characterization, the samples were transformed from the tube into a glass capillary (inner diameter 1 mm), and then positioned them between the X-ray source and detector. The distance between the detector and samples was about 2-3 m. The 2D SAXS patterns were collected by detecting X-ray exposure, and the 1D scattering curves (scattering intensity  $I(q)$  as a function of scattering vector ( $q$ ) were derived from the integration of 2D SAXS patterns. The scattering vector  $q = 4\frac{\pi}{\lambda} \sin\left(\frac{\theta}{2}\right)$ , where  $\lambda$  represents the wavelength of incident X-ray and  $\theta$  is the scattering angle of the X-ray. To highlight the structural information of assembly more effectively, we extracted the structure factor  $S(q)$  from the scattering curve  $I(q)$  by deducting the corresponding particle form factor  $P(q)$ , based on the formula  $I(q) = P(q) \times S(q)$ . The fitting of the 1D scattering curves was carried out with the PowderCell software by comparing the position of experimental scattering peaks with those of the corresponding standard model until obtaining the optimize result. Specifically, we first calculated the unit cell parameters based on the calculation formula for crystal plane spacing ( $d = \frac{2\pi}{q}$ ,  $d_{hkl} = \frac{1}{\sqrt{\frac{h^2+k^2+l^2}{a^2}}$  (simple cubic system)), and then utilized software to obtain the 1D standard scattering spectra of the theoretical unit cell according to calculated lattice parameters. After that, we compared the positions of the standard scattering peaks with our experimental scattering curves to identify the ultimate structure and parameters. If the theoretical model was not fit well, we finely adjusted the unit cell parameter appropriately to match the scattering peak position and height with those of the experimental 1D SAXS curves as closely as possible.



## Section 4. Supplementary Figures

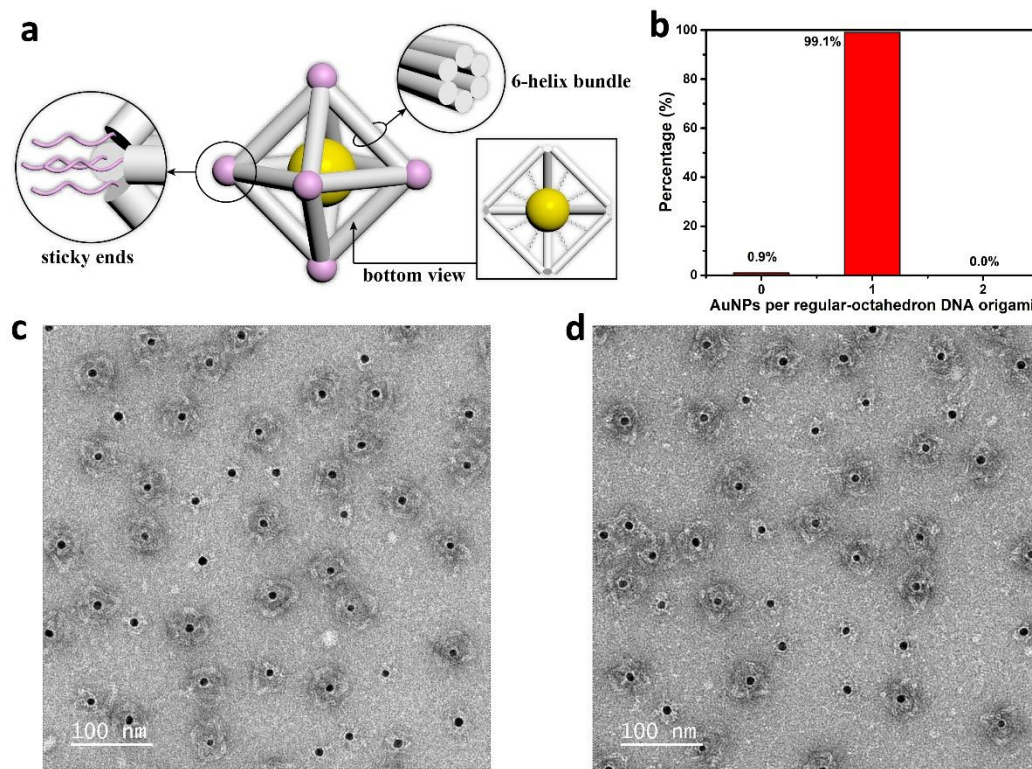

**Fig. S1** Schematic illustration of DNA origami building block and the corresponding TEM characterization. (a) 6-helix-bundle edges of the regular-octahedron DNA origami were simplified into single-helix-bundle edge, and the four sticky ends extending from the vertices were simplified into a small color ball for the convenience of description. The inserted 10 nm gold nanoparticle was captured by 8 inner strands to fix the nanoparticle in the center of regular-octahedron DNA origami. (b) Statistical analysis of the number of gold nanoparticles inserted into the regular-octahedron DNA origami. (c) (d) TEM images of DNA origami building blocks (scale bars, 100 nm).

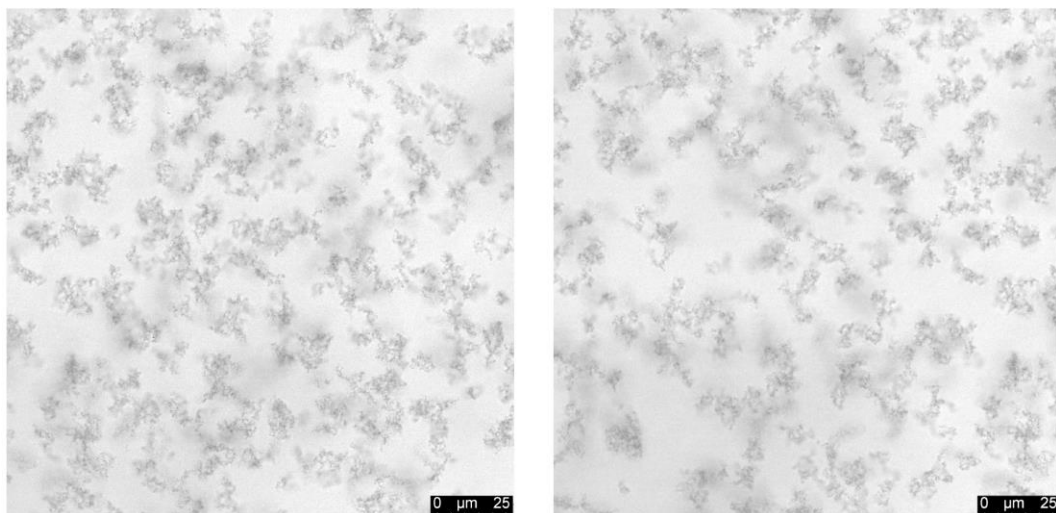

**Fig. S2** Large-scaled CLSM images of the assemblies grown at room temperature for 48 h without urea.

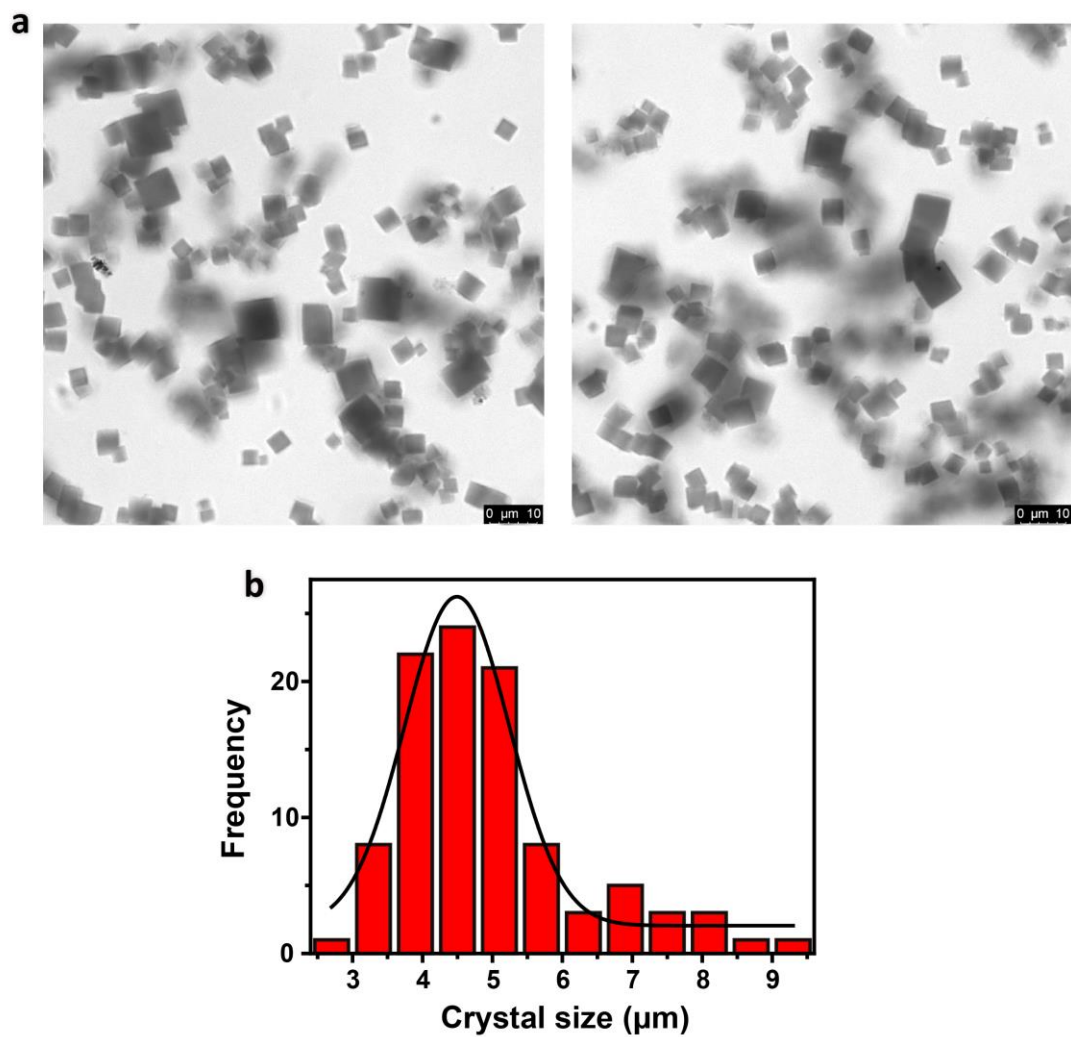

**Fig. S3** (a) Large-scaled CLSM images of the assemblies grown at room temperature for 48 h with 3.8 M urea. (b) Crystal size distribution histogram of the crystals incubated at room temperature for 48 h with 3.8 M urea.

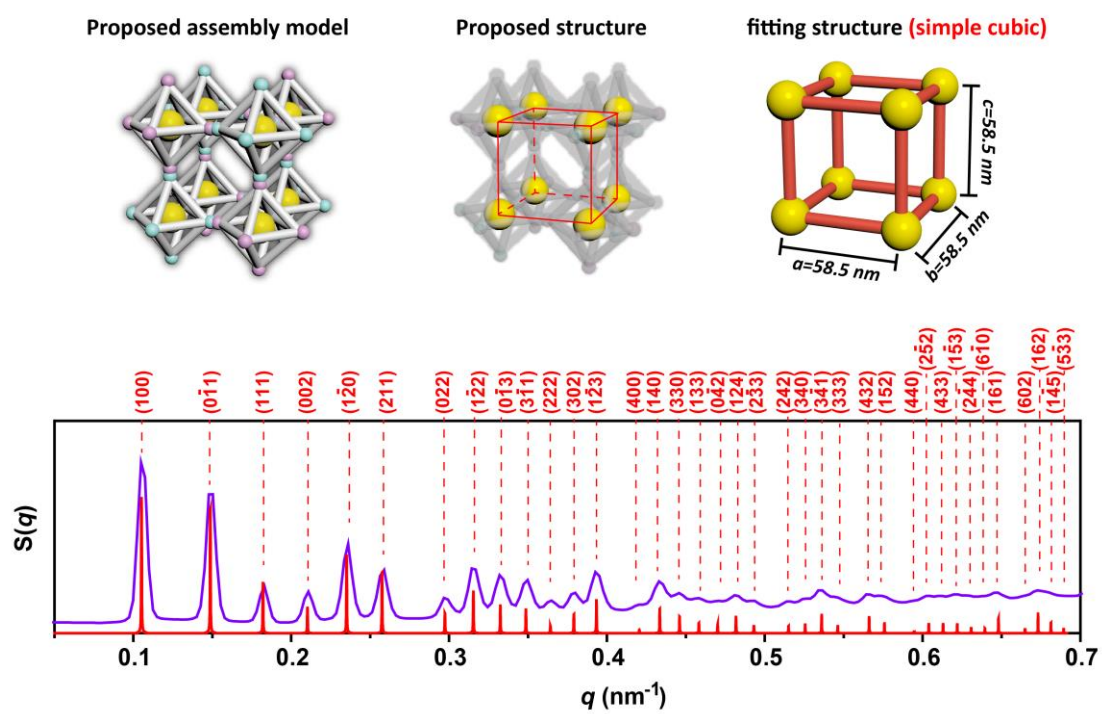

**Fig. S4** The fitting result of SAXS curves of crystals incubated at room temperature.

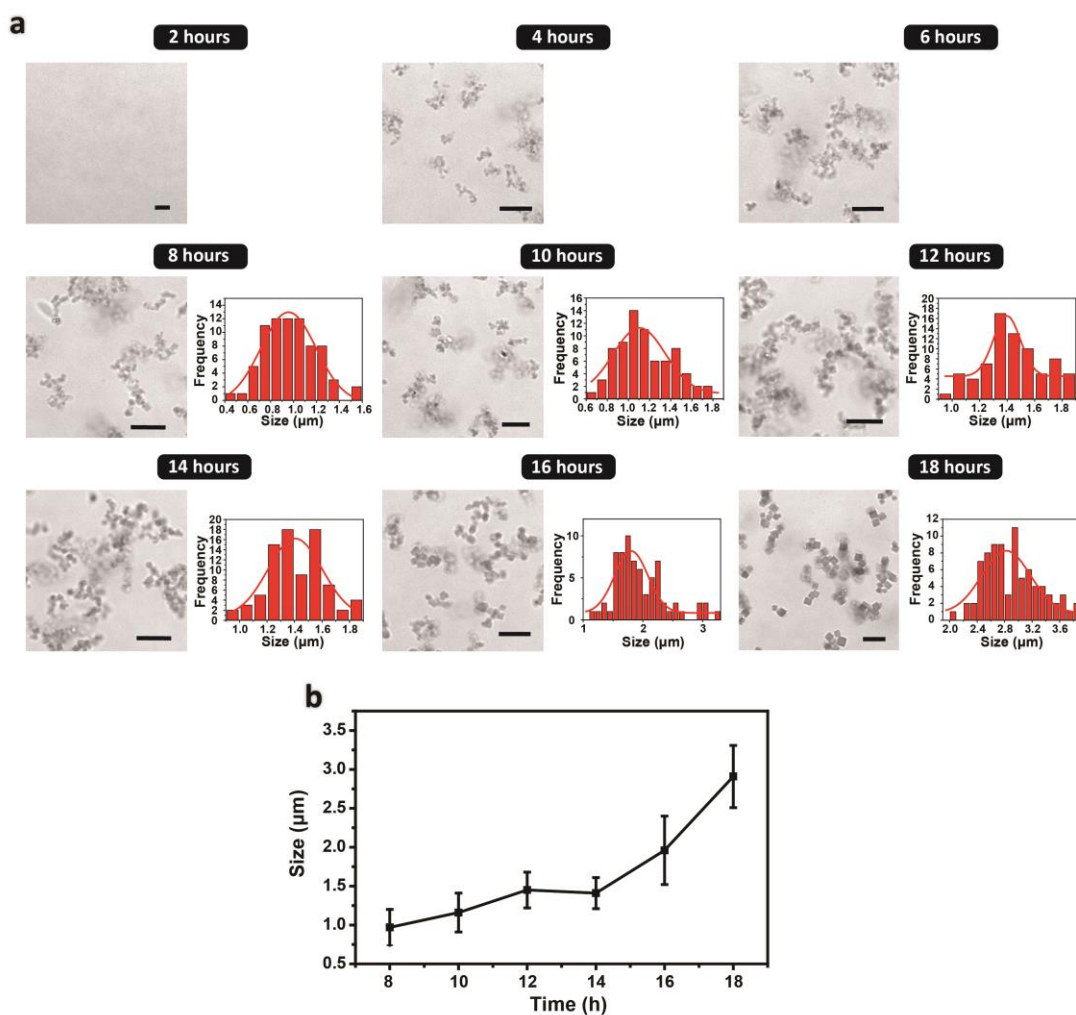

**Fig. S5** The development of crystal size over time. (a) Representative CLSM images of crystals with different growth time and the responding crystal size frequency distribution. Scale bars, 10 μm. Since the crystal with growth time less than six hours cannot distinguish the sides of cubic shape, we did not make size statistics, and we started to make size statistics from the eight hours. At each time point, the size of more than 70 crystals was counted. (b) development trend of average crystal size measured from CLSM images over time.

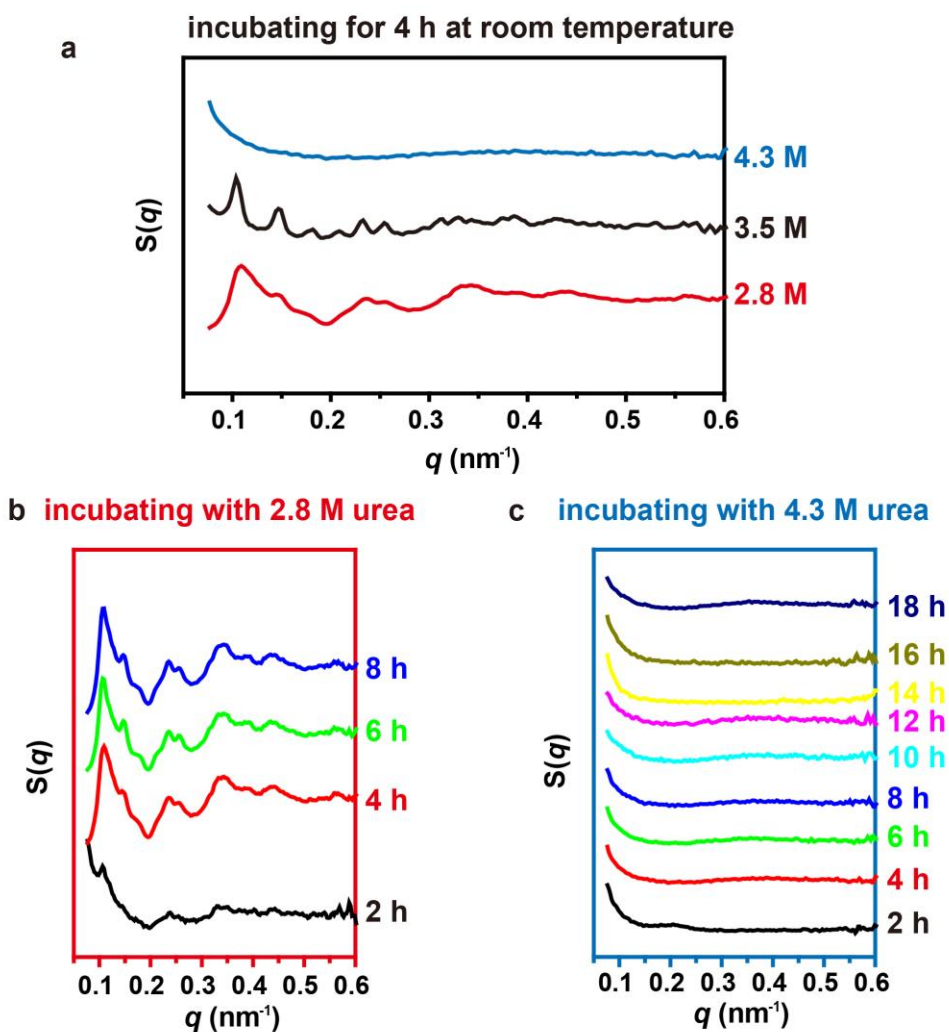

**Fig. S6** Comparison of DNA origami building blocks crystallized in 4.3 M, 3.5 M, and 2.8 M urea solution respectively at room temperature. (a) SAXS curves of samples after incubating with 4.3 M, 3.5 M, and 2.8 M urea respectively for 4 h at room temperature. From these SAXS curves, The DNA origami building blocks crystallized in 3.5 M urea solution, the DNA origami building blocks formed amorphous aggregates in 2.7 M urea solution, and the DNA origami building blocks were not assembled in 4.3 M urea solution. (b) SAXS curves of DNA origami building block assembling with time in 2.7 M urea solution. DNA origami building blocks cannot crystallize into ordered assemblies in 2.7 M urea solution. (c) SAXS curves of DNA origami building block assembling with time in 4.3 M urea solution. DNA origami building blocks remained monodisperse state within 18 hours.

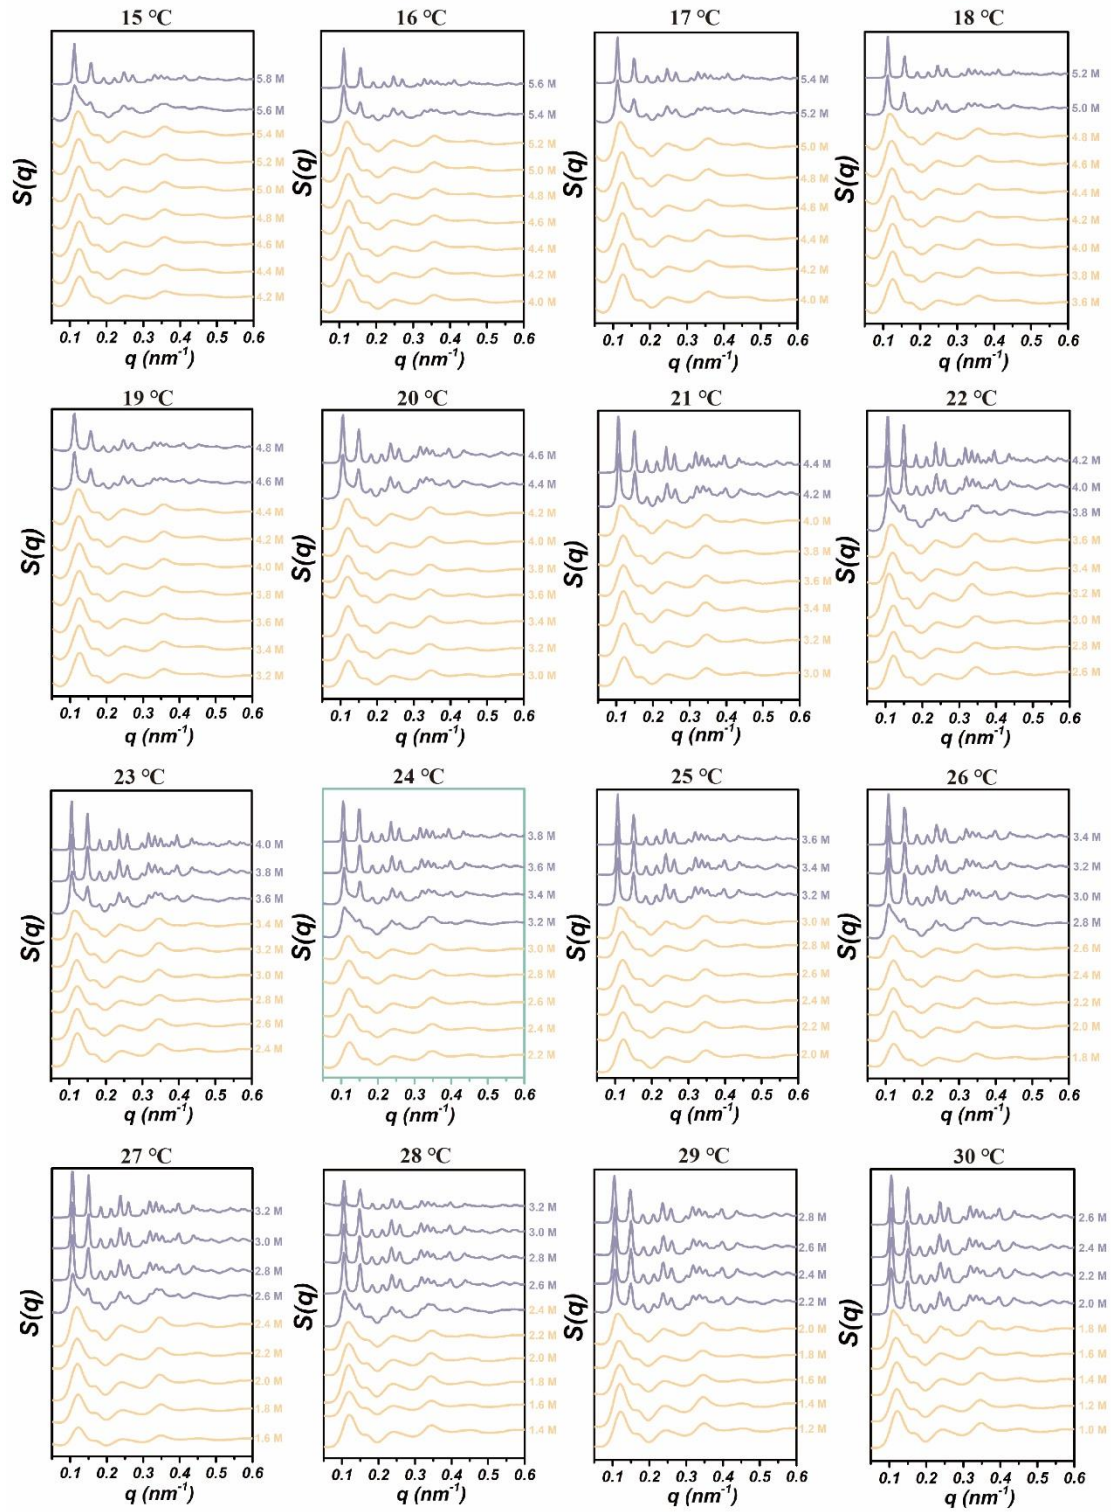

(Continue on next page)

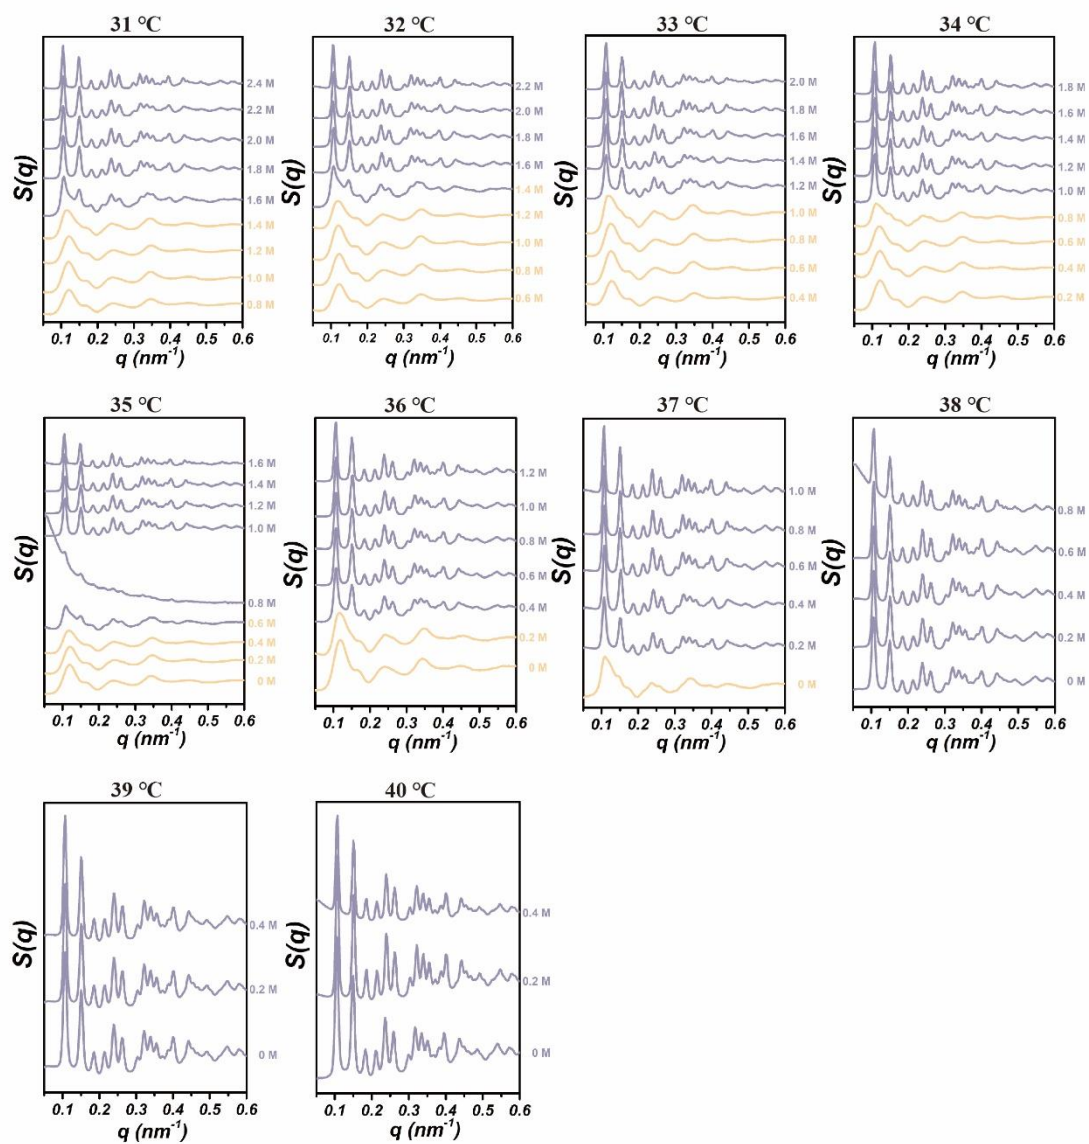

**Fig. S7** 1D SAXS curves of assemblies grown isothermally at fixed temperature with different urea concentration for 48 h.



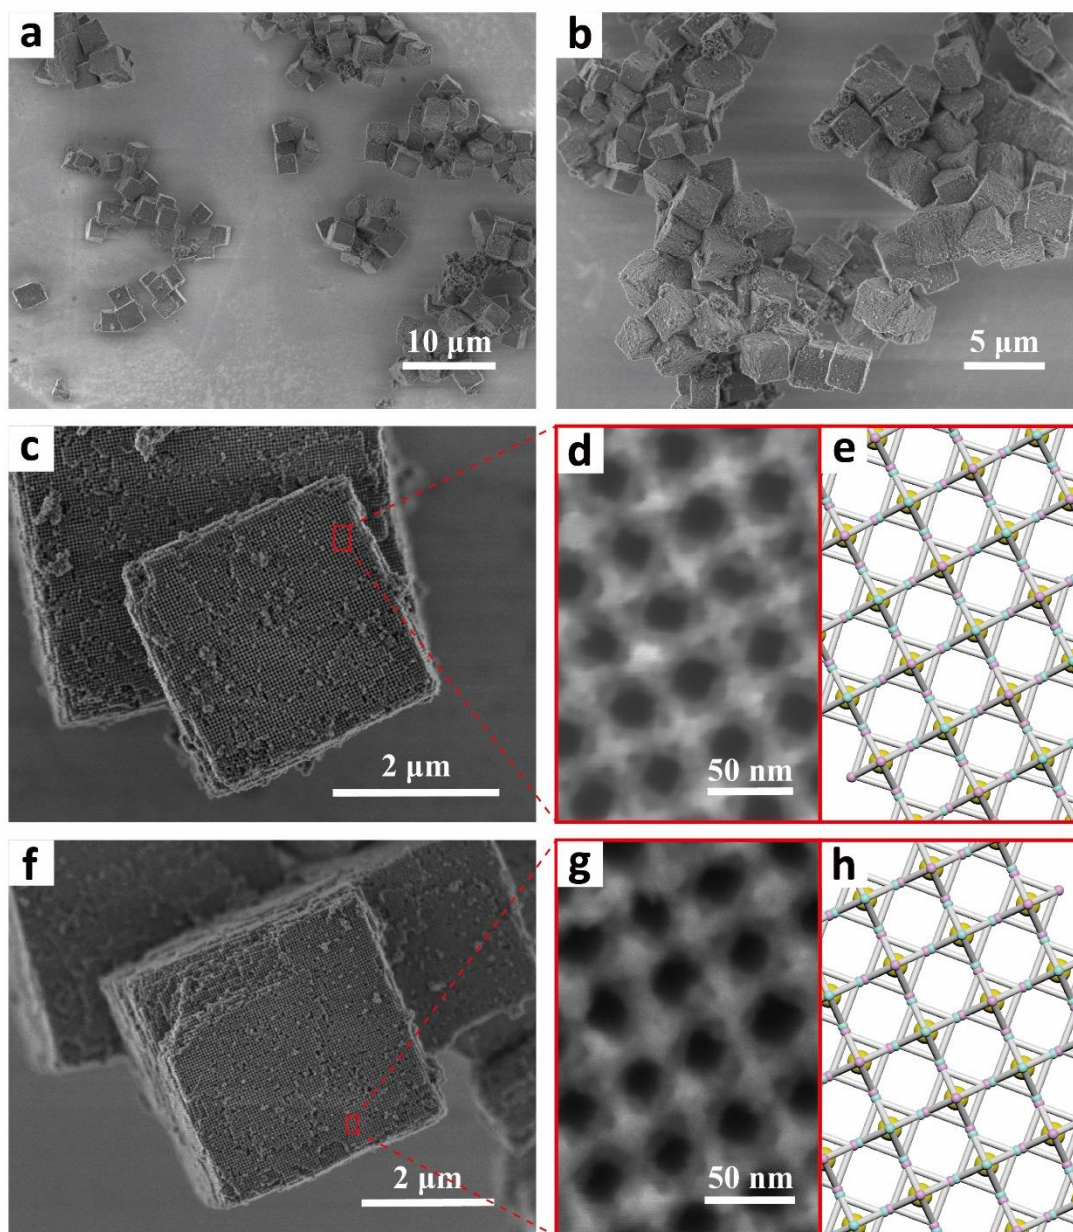

**Fig. S8** SEM images of the silica-coated DNA origami crystal incubated isothermally at 24 °C with 3.8 M urea concentration for 48 h. (a) (b) Large-scaled SEM image showed that the crystals had cubic Wulff shape. (c) (f) Representative SEM images of the single DNA origami crystals (scale bars, 2  $\mu\text{m}$ ). (d) (g) Enlarged SEM images of the region framed by red rectangle respectively in c and f, and the relative orientations between adjacent DOBs were identical (scale bars, 50 nm). (e) (h) Assembly models respectively corresponding to (d) and (g), in which the vertices of DNA origami building blocks are fully utilized for assembly.

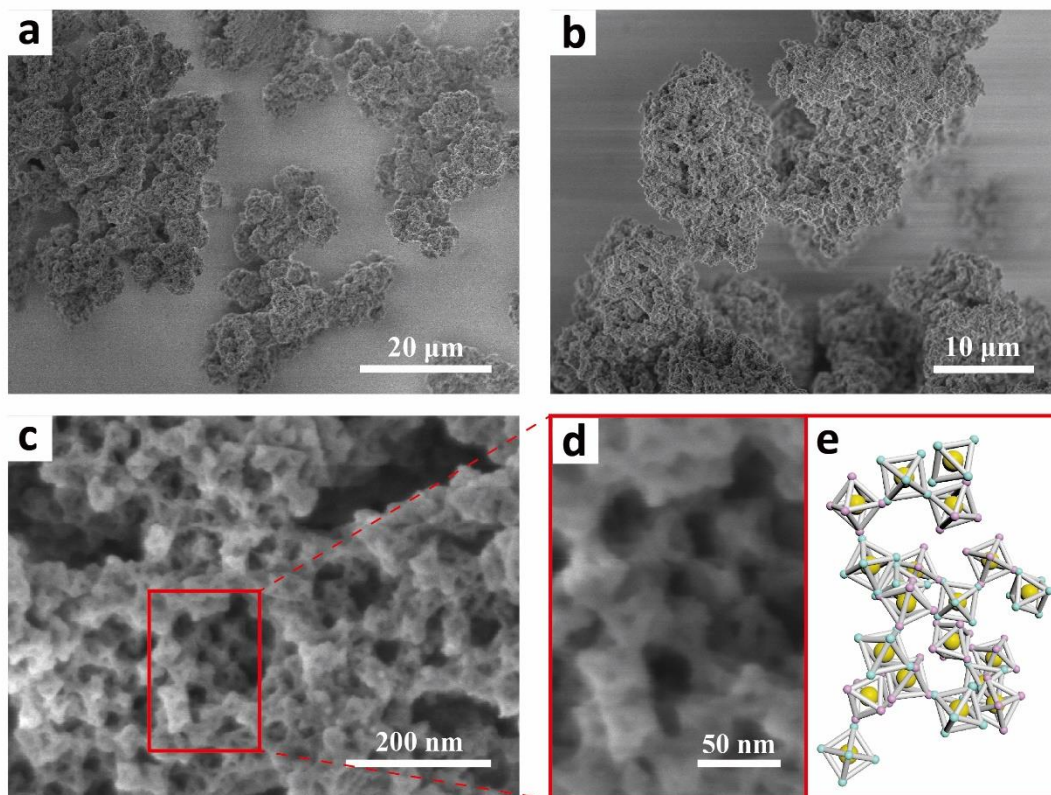

**Fig. S9** SEM images of the silica-coated amorphous aggregation incubated isothermally at 24 °C with 2.0 M urea concentration for 48 h. (a) (b) Large-scaled SEM image showed that the assembly were amorphous with no distinguishable shape. (c) Representative SEM image of the assembly details showed that the arrangement of DOBs was disordered and the relative orientation between the adjacent DNA origami building blocks was chaotic (scale bar, 200 nm). (d) Enlarged SEM image of the region framed by red rectangle in (c) (scale bar, 50 nm). (e) Assembly model corresponding to the aggregate shown in (d), in which the vertices were not fully utilized for assembly.

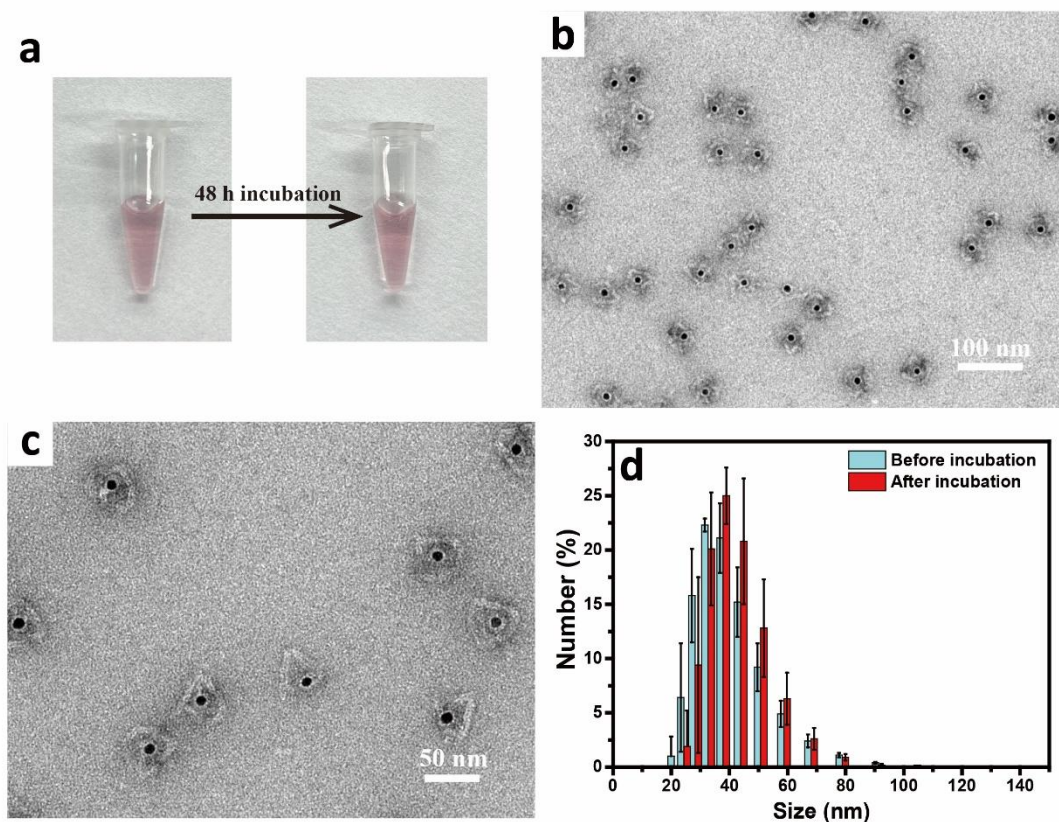

**Fig. S10** Characterization of the liquid phase incubated isothermally at 24 °C with 5.0 M urea concentration for 48 h. (a) Images of the samples before and after 48-hour incubation, and there was no precipitation at the bottom of the tube after incubation. (b) Large-scaled TEM image of samples after 48-hour incubation, which showed that there was no connection between most of DNA origami building blocks (scale bar, 100 nm). (c) Closed-up TEM images of samples after 48-hour incubation (scale bar, 50 nm). (d) Characterization results of dynamic light scattering for samples before and after incubation (samples before incubation: blue rectangle; samples after incubation: red rectangle), which was a distribution histogram of number (y axis, %) versus aggregate size (x axis, nm).

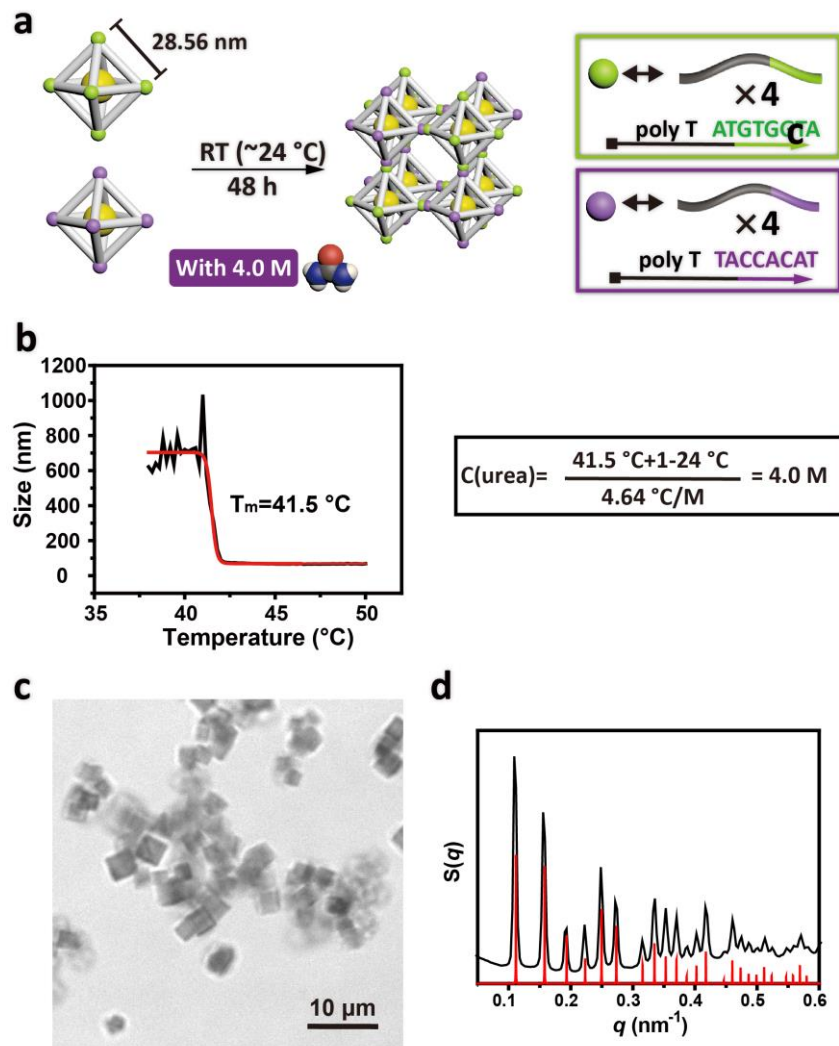

**Fig. S11** Universal validation of room-temperature synthesis approach. (a) The first system changed the sequence of the sticky ends extending from the vertices of regular-octahedral DNA origami framework. We anticipate that this system can be crystallized at room temperature (24 °C) with 4.0 M urea. (b) The original  $T_m$  of the first system measured by DLS, and the calculation of urea concentration required for crystallization at 24 °C. (c) The representative CLSM images of the first system after incubating at room temperature (24 °C) for 48 hours. Scale bar, 10 μm. (d) The 1D SAXS curve of the first system after incubating at room temperature (24 °C) for 48 hours.

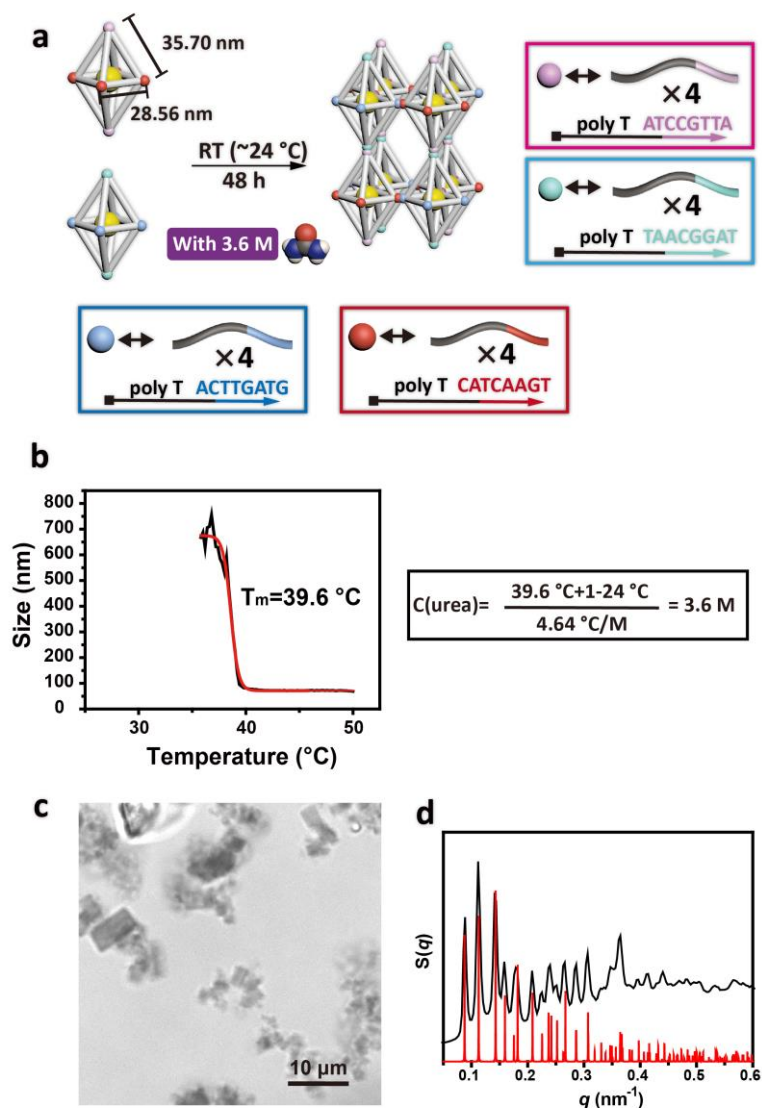

**Fig. S12** Universal validation of room-temperature synthesis approach. (a) The second system changed the shape of DNA origami frameworks and the sequence of sticky ends at the same time. The DNA origami used in this system is elongated-octahedral DNA origami framework. We anticipate that this system can be crystallized at room temperature ( $24\text{ }^{\circ}\text{C}$ ) with 3.6 M urea. (b) The original  $T_m$  of the second system measured by DLS, and the calculation of urea concentration required for crystallization at  $24\text{ }^{\circ}\text{C}$ . (c) The representative CLSM images of the second system after incubating at room temperature ( $24\text{ }^{\circ}\text{C}$ ) for 48 hours. Scale bar,  $10\text{ }\mu\text{m}$ . (d) The 1D SAXS curve of the second system after incubating at room temperature ( $24\text{ }^{\circ}\text{C}$ ) for 48 hours.

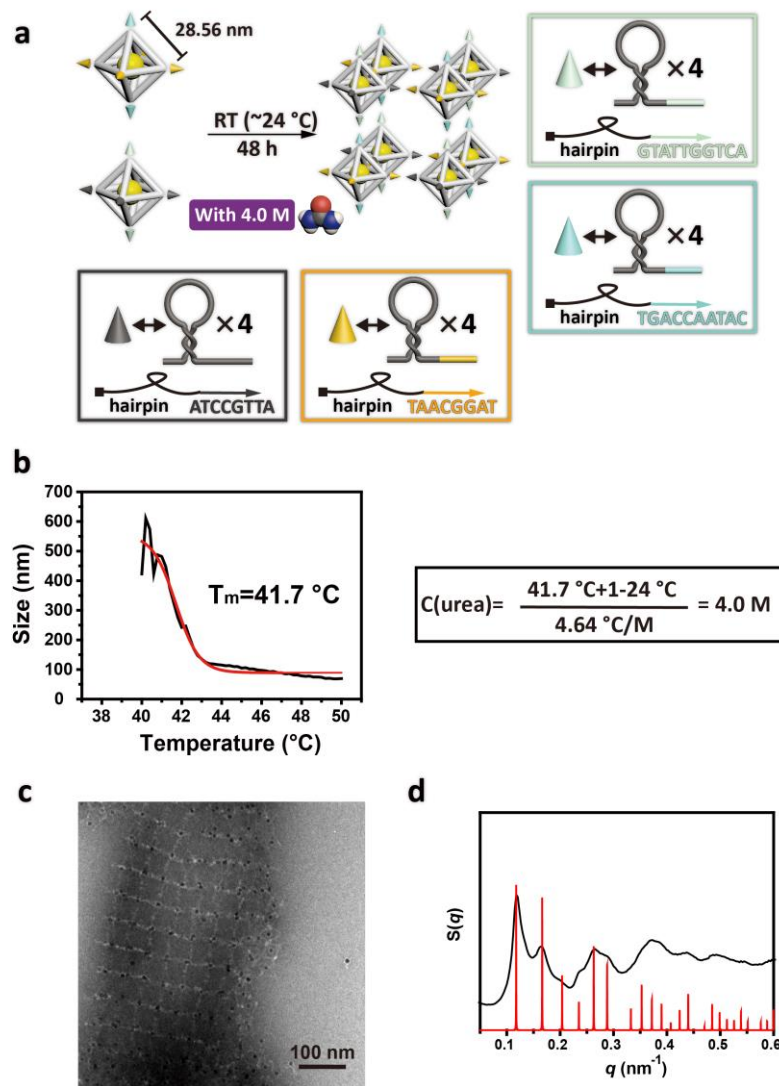

**Fig. S13** Universal validation of room-temperature synthesis approach. (a) The third system changed the flexible region of sticky ends into a hairpin DNA conformation, and the complementary base number was increased to 10 bases. We anticipate that this system can be crystallized at room temperature ( $24^\circ\text{C}$ ) with 4.0 M urea. (b) The original  $T_m$  of the third system measured by DLS, and the calculation of urea concentration required for crystallization at  $24^\circ\text{C}$ . (c) The representative TEM images of the third system after incubating at room temperature ( $24^\circ\text{C}$ ) for 48 hours. Scale bar, 100 nm. (d) The 1D SAXS curve of the third system after incubating at room temperature ( $24^\circ\text{C}$ ) for 48 hours.

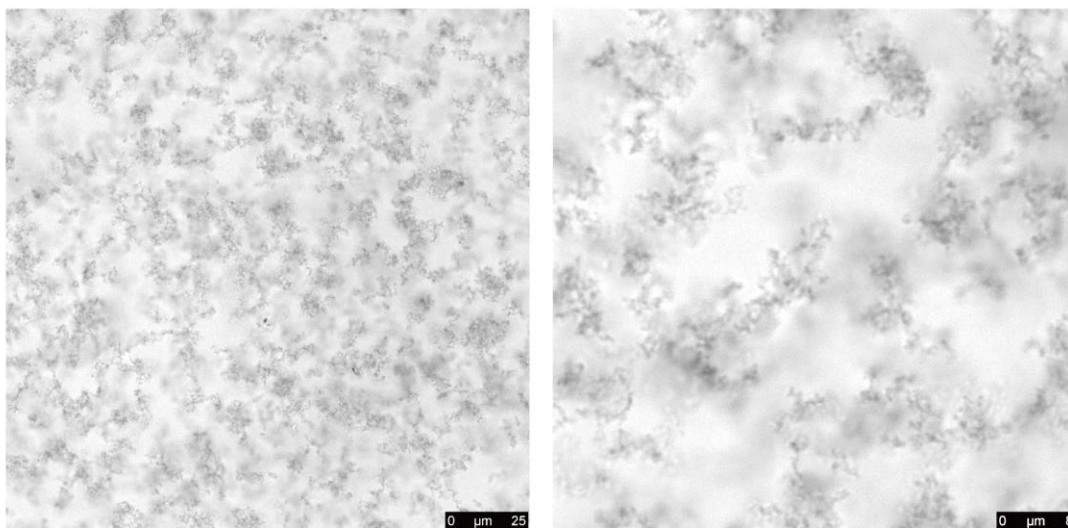

**Fig. S14** Large-scaled CLSM images of the assemblies grown at outdoor temperature for 48 h without urea.

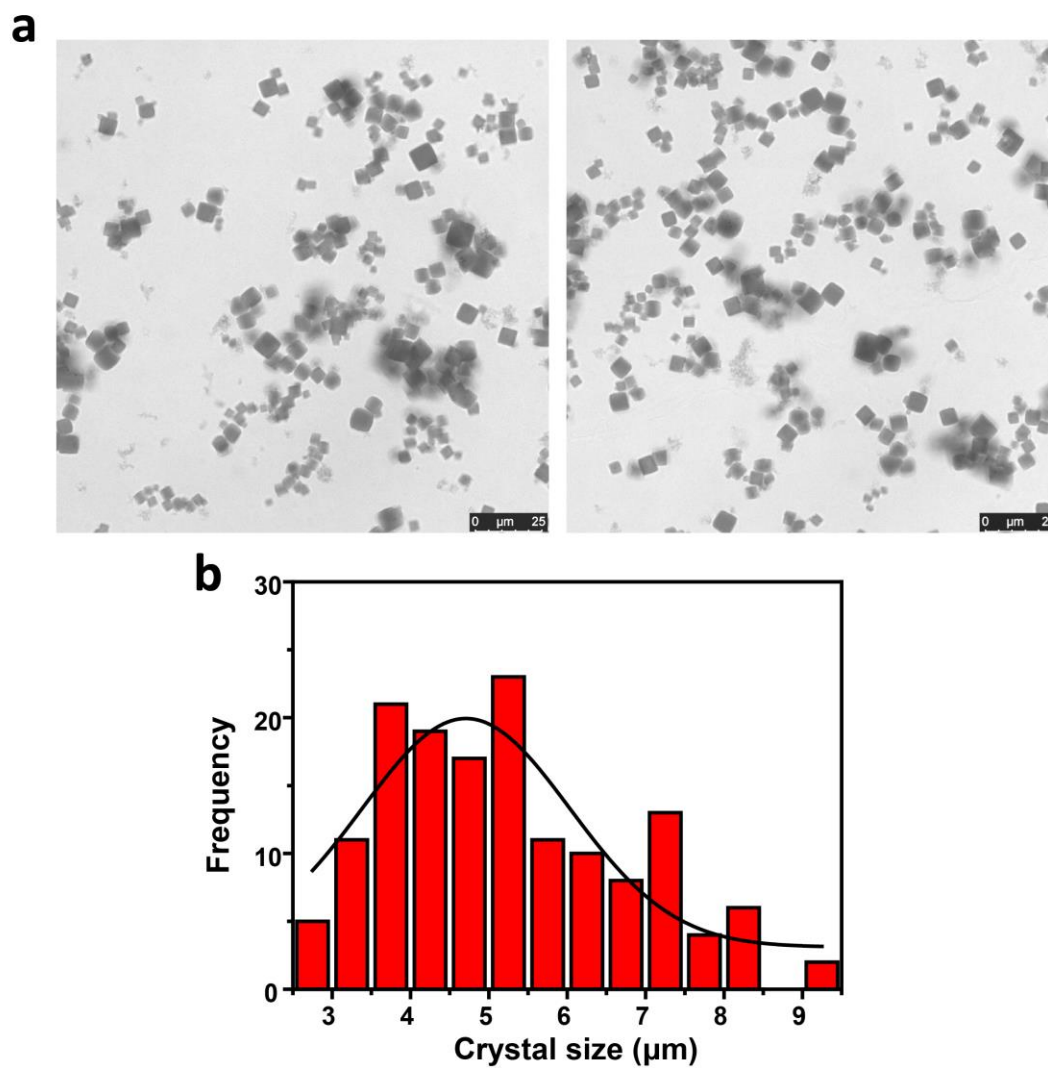

**Fig. S15** (a) Large-scaled CLSM images of the assemblies grown at outdoor temperature for 48 h with 3.0 M urea. (b) Crystal size distribution histogram of the crystals incubated at outdoor temperature for 48 h with 3.0 M urea.



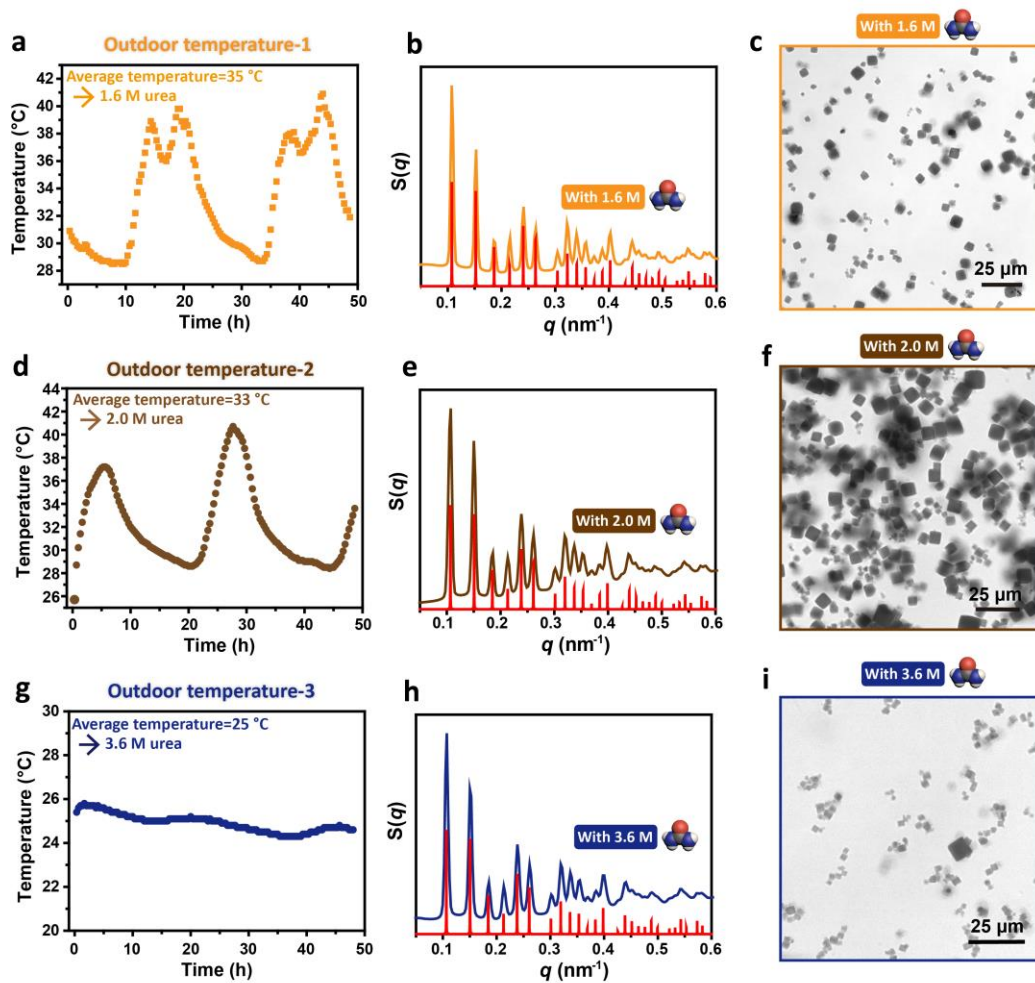

**Fig. S16** Crystallization of DNA origami building blocks at different outdoor conditions. (a) (d) (g) Temperature variation curves of 48 h outdoor temperature. (b) (e) (h) 1D SAXS curves and fitting curve (red) of assemblies incubated with 1.6 M (b), 2.0 M (e), and 3.6 M (h) urea, respectively, at outdoor temperature. (c) (f) (i) Representative CLSM image of the crystals incubated with 1.6 M (c), 2.0 M (f), and 3.6 M (i) urea, respectively, at outdoor temperature.

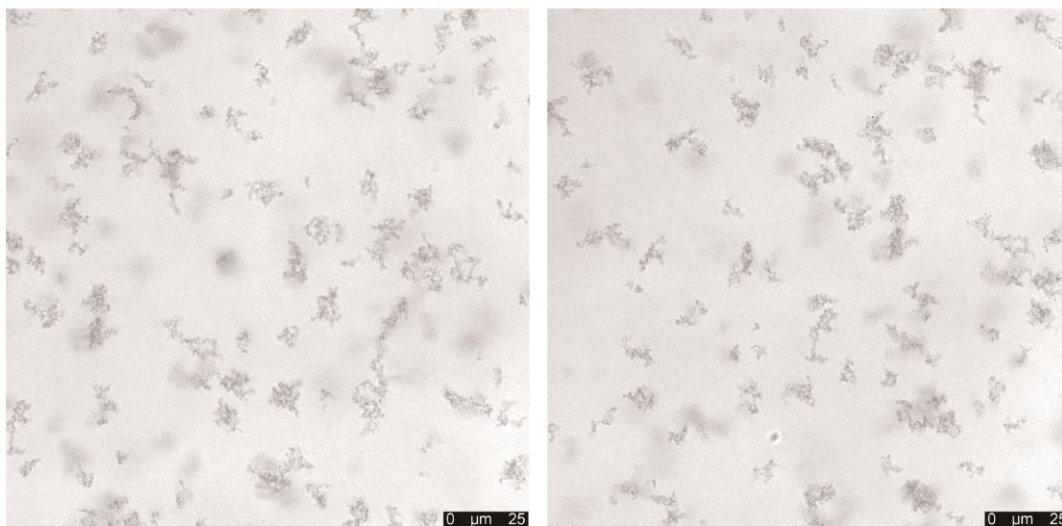

**Fig. S17** Large-scaled CLSM images of the assemblies grown at simulated outdoor temperature for 48 h without urea.

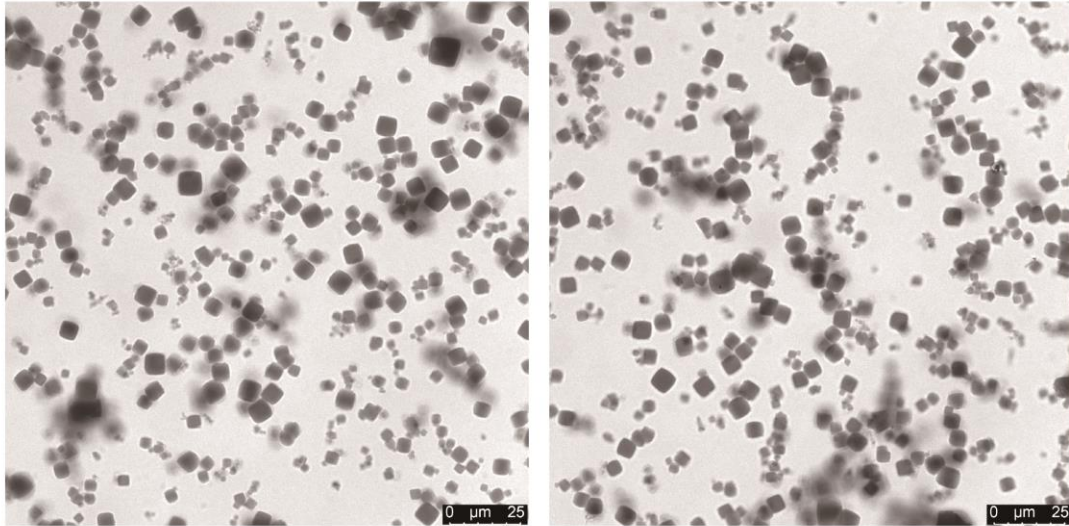

**Fig. S18** Large-scaled CLSM images of the assemblies grown at simulated outdoor temperature for 48 h with 2.8 M urea.

## **Section 5. DNA Sequence (all sequences are in order 5' to 3')**

### **a. Staples of regular-octahedral DNA origami frames (PAGE purified)**

Staple-1: TCAAAGCGAACCAGACCGTTTTATATAGTC

Staple-2: GCTTTGAGGACTAAAGAGCAACGGGGAGTT

Staple-3: GTAAATCGTCGCTATTGAATAACTCAAGAA

Staple-4: AAGCCTTAAATCAAGACTTGCGGAGCAAAT

Staple-5: ATTTAAGAAGCTGGCTTGAATTATCAGTGA

Staple-6: GTTAAAATTCGCATTATAAACGTAAACTAG

Staple-7: AGCACCATTACCATTACAGCAAATGACGGA

Staple-8: ATTGCGTAGATTTTCAAACAGATTGTTTG

Staple-9: TAACCTGTTTAGCTATTTTCGCATTCATTC

Staple-10: GTCAGAGGGTAATTGAGAACACCAAATAG

Staple-11: CTCCAGCCAGCTTTCCCCTCAGGACGTTGG

Staple-12: GTCCACTATTAAAGAACCAGTTTTGGTTCC

Staple-13: TAAAGGTGGCAACATAGTAGAAAATAATAA

Staple-14: GATAAGTCCTGAACAACCTGTTTAAAGAGAA

Staple-15: GGTAATAGTAAAATGTAAGTTTTACTAT

Staple-16: TCAGAACCGCCACCCTCTCAGAGTATTAGC

Staple-17: AAGGGAACCGAAGCTGAGCAGACGGTATCAT

Staple-18: GTAAAGATTCAAAGGCCTGAGTTGACCCT

Staple-19: AGGCGTTAAATAAGAAGACCGTGTCAAG

Staple-20: CAGGTCGACTCTAGAGCAAGCTTCAAGGCG

Staple-21: CAGAGCCACCACCCTCTCAGAACTCGAGAG

Staple-22: TTCACGTTGAAAATCTTGCGAATGGGATTT

Staple-23: AAGTTTTAACGGGGTCGGAGTGTAAGTGG

Staple-24: TTGCGTATTGGGCGCCCGCGGGGTGCGCTC

Staple-25: GTCACCAGAGCCATGGTGAATTATCACCAATCAGAAAAGCCT

Staple-26: GGACAGAGTTACTTTGTTCGAAATCCGCGTGTATCACCGTACG

Staple-27: CAACATGATTTACGAGCATGGAATAAGTAAGACGACAATAAA

Staple-28 AACCAGACGCTACGTTAATAAAAACGAACATAACCACATTCAGG

Staple-29: TGACCTACTAGAAAAAGCCCCAGGCAAAGCAATTCATCTTC  
Staple-30: TGCCGGAAGGGGACTCGTAACCGTGCATTATATTTTAGTTCT  
Staple-31: AGAACCCCAAATCACCATCTGCGGAATCGAATAAAAATTTTT  
Staple-32: GCTCCATTGTGTACCGTAACACTGAGTTAGTTAGCGTAACCT  
Staple-33: AGTACCGAATAGGAACCCAAACGGTGTAACCTCAGGAGGTTT  
Staple-34: CAGTTTGAATGTTTAGTATCATATGCGTAGAATCGCCATAGC  
Staple-35: AAGATTGTTTTTTAACCAAGAAACCATCGACCCAAAAACAGG  
Staple-36: TCAGAGCGCCACCACATAATCAAATCAGAACGAGTAGTATG  
Staple-37: GATGGTTGGGAAGAAAAATCCACCAGAAATAATTGGGCTTGA  
Staple-38: CTCCTTAACGTAGAAACCAATCAATAATTCATCGAGAACAGA  
Staple-39: AGACACCTTACGCAGAACTGGCATGATTTTCTGTCCAGACAA  
Staple-40: GCCAGCTAGGCGATAGCTTAGATTAAGACCTTTTAAACCTGT  
Staple-41: CCGACTTATTAGGAACGCCATCAAAAATGAGTAACAACCCCA  
Staple-42: GTCCAATAGCGAGAACCAGACGACGATATTCAACGCAAGGGA  
Staple-43: CCAAATACAATATGATATTCAACCGTTAGGCTATCAGGTAA  
Staple-44: AACAGTACTTGAAAACATATGAGACGGGTCTTTTTTAATGGA  
Staple-45: TTTACCCGCATTAAGTCGGGAAACCTGATTTGAATTACCCA  
Staple-46: GAGAATAGAGCCTTACCGTCTATCAAATGGAGCGGAATTAGA  
Staple-47: ATAATTAAATTTAAAAAATTTTTCAAATTTTAAACAACGCC  
Staple-48: GCACCCAGCGTTTTTTATCCGGTATTCTAGGCGAATTATTCA  
Staple-49: GGAAGCGCCACAAACAGTTAATGCCCCGACTCCTCAAGATA  
Staple-50: GTTTGCCTATTCACAGGCAGGTCAGACGCCACCACACCACCC  
Staple-51: CGCGAGCTTAGTTTTTCCCAATTCTGCGCAAGTGTAAGCCT  
Staple-52: AGAAGCAACCAAGCCAAAAGAATACTAATGCCAAAACCTCC  
Staple-53: ATTAAGTATAAAGCGGCAAGGCAAAGAACTAATAGGGTACC  
Staple-54: CAGTGCCTACATGGGAATTTACCGTTCCACAAGTAAGCAGAT  
Staple-55: ATAAGGCGCCAAAAGTTGAGATTTAGGATAACGGACCAGTCA  
Staple-56: TGCTAAACAGATGAAGAAACCACCAGAATTTAAAAAAAGGCT  
Staple-57: CAGCCTTGGTTTTGTATTAAGAGGCTGACTGCCTATATCAGA  
Staple-58: CGGAATAATTCAACCCAGCGCCAAAGACTTATTTTAAACGCAA

Staple-59: CGCCTGAATTACCCTAATCTTGACAAGACAGACCATGAAAGA  
Staple-60: ACGCGAGGCTACAACAGTACCTTTTACAAATCGCGCAGAGAA  
Staple-61: CAGCGAACATTA AAAAGAGAGTACCTTTACTGAATATAATGAA  
Staple-62: GGACGTTTAATTTGACGAGAAACACCACCACTAATGCAGAT  
Staple-63: AAAGCGCCAAAGTTTATCTTACCGAAGCCCAATAATGAGTAA  
Staple-64: GAGCTCGTTGTAAACGCCAGGGTTTTCCAAAGCAATAAAGCC  
Staple-65: AATTATTGTTTTTCATGCCTTTAGCGTCAGATAGCACGGAAAC  
Staple-66: AAGTTTCAGACAGCCGGGATCGTCACCCTTCTGTAGCTCAAC  
Staple-67: ACAAAGAAATTTAGGTAGGGCTTAATTGTATACAACGGAATC  
Staple-68: AACAAAATAACTAGGTCTGAGAGACTACGCTGAGTTTCCCT  
Staple-69: CATAACCTAAATCAACAGTTCAGAAAACGTCATAAGGATAGC  
Staple-70: CACGACGAATTCGTGTGGCATCAATTCCTTAGCAAATTACG  
Staple-71: CCTACCAACAGTAATTTATCCTGAATCAAACAGCCATATGA  
Staple-72: GATTATAAAGAAACGCCAGTTACAAAATTTACCAACGTCAGA  
Staple-73: AGTAGATTGAAAAGAATCATGGTCATAGCCGGAAGCATAAGT  
Staple-74: TAGAATCCATAAATCATTTAACAATTTCTCCCGGCTTAGGTT  
Staple-75: AAAGGCCAAATATGTTAGAGCTTAATTGATTGCTCCATGAGG  
Staple-76: CCAAAGGAAAGGACAACAGTTTCAGCGAATCATCATATTC  
Staple-77: GAAATCGATAACCGGATACCGATAGTTGTATCAGCTCCAACG  
Staple-78: TGAATATTATCAAATAATGGAAGGGTTAATATTTATCCCAA  
Staple-79: GAGGAAGCAGGATTCGGGTAAAATACGTAAAACACCCCCAG  
Staple-80: GGTTGATTTTCCAGCAGACAGCCCTCATTTCGTCACGGGATAG  
Staple-81: CAAGCCCCACCCTTAGCCCGGAATAGGACGATCTAAAGTTT  
Staple-82: TG TAGATATTACGCGGCGATCGGTGCGGGCGCCATCTTCTGG  
Staple-83: CATCCTATTCAGCTAAAAGGTAAAGTAAAAGCAAGCCGTTT  
Staple-84: CAGCTCATATAAGCGTACCCCGGTTGATGTGTCGGATTCTCC  
Staple-85: CATGTCACAAACGGCATTAAATGTGAGCAATTCGCGTTAAAT  
Staple-86: AGCGTCACGTATAAGAATTGAGTTAAGCCCTTTTTAAGAAAG  
Staple-87: TATAAAGCATCGTAACCAAGTACCGCACCGGCTGTAATATCC  
Staple-88: ATAGCCCGCGAAAATAATTGTATCGGTTTCGCCGACAATGAGT

Staple-89: AGACAGTTCATATAGGAGAAGCCTTTATAACATTGCCTGAGA

Staple-90: AACAGGTCCCGAAATTGCATCAAAAAGATCTTTGATCATCAG

Staple-91: ACTGCCCTTGCCCCGTTGCAGCAAGCGGCAACAGCTTTTTTCT

Staple-92: TCAAAGGGAGATAGCCCTTATAAATCAAGACAACAACCATCG

Staple-93: GTAATACGCAAACATGAGAGATCTACAACCTAGCTGAGGCCGG

Staple-94: GAGATAACATTAGAAGAATAACATAAAAAGGAAGGATTAGGA

Staple-95: CAGATATTACCTGAATACCAAGTTACAATCGGGAGCTATTTT

Staple-96: CATATAACTAATGAACACAACATACGAGCTGTTTCTTTGGGG

Staple-97:

ATGTTTTGCTTTTGATCGGAACGAGGGTACTTTTTCTTTTGATAAGAGGTCATT

Staple-98:

CTTCGCTGGGCGCAGACGACAGTATCGGGGCACCGTCGCCATTCAGGCTGCGCA

Staple-99:

GATATTCTAAATTGAGCCGGAACGAGGCCCAACTTGGCGCATAGGCTGGCTGAC

Staple-100:

TGTCGTCATAAGTACAGAACCGCCACCCATTTTCACAGTACAACTACAACGCC

Staple-101:

CGATTATAAGCGGAGACTTCAAATATCGCGGAAGCCTACGAAGGCACCAACCTA

Staple-102:

AACATGTACGCGAGTGGTTTGAAATACCTAAACACATTCTTACCAGTATAAAGC

Staple-103:

GTCTGGATTTGCGTTTTAAATGCAATGGTGAGAAATAAATTAATGCCGGAGAG

Staple-104:

GCCTTGAATCTTTCCGGAACCGCCTCCAGAGCCCAGAGCCGCCGCCAGCATT

Staple-105:

CGCTGGTGCTTTTCTGAATCGGCCAACGAGGGTGGTGATTGCCCTTCAACGCCT

Staple-106:

ACATAACTTGCCCTAACTTTAATCATTGCATTATAACAACATTATTACAGGTAG

Staple-107:

TTATTTTACCGACAATGCAGAACGCGCGAAAAATCTTTCCTTATCATTCCAAG

Staple-108:

TTTCAATAGAAGGCAGCGAACCTCCCGATTAGTTGAAACAATAACGGATTGCGCC

Staple-109:

GGGCGACCCCAAAGTATGTTAGCAAACCTAAAAGAGTCACAATCAATAGAAAAT

Staple-110:

ATGACCACTCGTTTGGCTTTTGCAAAAGTTAGACTATATTCATTGAATCCCCCT

Staple-111:

TCCAAATCTTCTGAATTATTTGCACGTAGGTTTAACGCTAACGAGCGTCTTTCC

Staple-112:

GGGTTATTTAATTACAATATATGTGAGTAATTAATAAGAGTCAATAGTGAATTT

**b. Sticky ends of regular-octahedral DNA origami frames (ULTRAPAGE purified)**

SE-A-1:

CAAATGCTTTAAAAAATCAGGTCTTTAAGAGCAGCCAGAGGGTTTTTTTTTTTTTTTTT  
TTTTTATCCGTTA

SE-A-2:

AAAGATTCATCAGGAATTACGAGGCATGCTCATCCTTATGCGTTTTTTTTTTTTTTTTT  
TTTTTATCCGTTA

SE-A-3:

CTTCATCAAGAGAAATCAACGTAACAGAGATTTGTCAATCATTTTTTTTTTTTTTTTTT  
TTTTTATCCGTTA

SE-A-4:

AAACGAAAGAGGGCGAAACAAAGTACTGACTATATTCGAGCTTTTTTTTTTTTTTTTTT  
TTTTTATCCGTTA

SE-A-5:

GGTAGCTATTTAGAGAATCGATGAAAACATTAATGTGTAGTTTTTTTTTTTTTTTTT  
TTTTTATCCGTTA

SE-A-6:

ATAAATCATAATAAATCGGTTGTACTGTGCTGGCATGCCTGTTTTTTTTTTTTTTTTT  
TTTTTATCCGTTA



SE-A-7:

ACTGTTGGGAAGCAGCTGGCGAAAGGATAGGTCAAGATCGCATTTTTTTTTTTTTTTTTT  
TTTTATCCGTTA

SE-A-8:

AGCTTTCATCAACGGATTGACCGTAAAATCGTATAATTTTTTTTTTTTTTTTTTTT  
TTTATCCGTTA

SE-A-9:

GACAGGAGGTTGAAACAAATAAATCCGCCCCCTCCGCCACCCTTTTTTTTTTTTTTTTT  
TTTTATCCGTTA

SE-A-10:

CAGAATCAAGTTTCGGCATTTCGGTTAAATATATCACCAGTTTTTTTTTTTTTTTTTT  
TTTATCCGTTA

SE-A-11:

TCATATGGTTTACGATTGAGGGAGGGAAACGCAATACATACATTTTTTTTTTTTTTTTT  
TTTTATCCGTTA

SE-A-12:

AATAGCAATAGCACCAGAAGGAAACCTAAAGCCACTGGTAATTTTTTTTTTTTTTTTTT  
TTTTATCCGTTA

SE-A-13:

TGTAGCATTCCAACGTTAGTAAATGAAGTGCCGCGCCACCCTTTTTTTTTTTTTTTTTT  
TTTTATCCGTTA

SE-A-14:

GAAACATGAAAGCTCAGTACCAGGCGAAAAATGCTGAACAAATTTTTTTTTTTTTTTTT  
TTTTATCCGTTA

SE-A-15:

AGAGCCTAATTTGATTTTTGTTTAAATCCTGAAATAAAGAATTTTTTTTTTTTTTTTTT  
TTTATCCGTTA

SE-A-16:

TTTGCGGAACAATGGCAATTCATCAATCTGTATAATAATTTTTTTTTTTTTTTTTTTT  
TTTATCCGTTA

SE-A-17:

TTTGCGGATGGCCAACCTAAAGTACGGGCTGCAGCTACAGAGTTTTTTTTTTTTTTTTTT  
TTTTTATCCGTTA

SE-A-18:

CTTAAACAGCTTATATATTCGGTCGCTTGATGGGGAACAAGATTTTTTTTTTTTTTTTTTT  
TTTTTATCCGTTA

SE-A-19:

GGCCCTGAGAGAAGCAGGCGAAAATCATTGCGTAGAGGCGGTTTTTTTTTTTTTTTTTTTT  
TTTTTATCCGTTA

SE-A-20:

GCTCACAATTCGGTGAGCTAACTCACTGGAAGTAATGGTCAATTTTTTTTTTTTTTTTTTT  
TTTTTATCCGTTA

SE-A-21:

CAACGCTCAACAGCAGAGGCATTTTCAATCCAATGATAAATATTTTTTTTTTTTTTTTTTT  
TTTTTATCCGTTA

SE-A-22:

ATCAAAAATCATATATGTAAATGCTGAACAAACACTTGCTTCTTTTTTTTTTTTTTTTTTTTT  
TTTTATCCGTTA

SE-A-23:

TGATTGCTTTGAGCAAAGAAGATGAAATAGCAGAGGTTTTGTTTTTTTTTTTTTTTTTTTT  
TTTTTATCCGTTA

SE-A-24:

AACGGGTATTAAGGAATCATTACCGCCAGTAATTCAACAATATTTTTTTTTTTTTTTTTTTTT  
TTTTTATCCGTTA

SE-B-1:

CAAATGCTTTAAAAAATCAGGTCTTTAAGAGCAGCCAGAGGGTTTTTTTTTTTTTTTTTTTT  
TTTTTTAACGGAT

SE-B-2:

AAAGATTCATCAGGAATTACGAGGCATGCTCATCCTTATGCGTTTTTTTTTTTTTTTTTTTT  
TTTTTTAACGGAT

SE-B-3:

CTTCATCAAGAGAAATCAACGTAACAGAGATTTGTCAATCATTTTTTTTTTTTTTTTTTTT  
TTTTTAACGGAT

SE-B-4:

AAACGAAAGAGGGCGAAACAAAGTACTGACTATATTCGAGCTTTTTTTTTTTTTTTTTTTT  
TTTTTTAACGGAT

SE-B-5:

GGTAGCTATTTTAGAGAATCGATGAAAACATTAATGTGTAGTTTTTTTTTTTTTTTTTTT  
TTTTTAACGGAT

SE-B-6:

ATAAATCATAATAAATCGGTTGTACTGTGCTGGCATGCCTGTTTTTTTTTTTTTTTTTTT  
TTTTAACGGAT

SE-B-7:

ACTGTTGGGAAGCAGCTGGCGAAAGGATAGGTCAAGATCGCATTTTTTTTTTTTTTTTTTTT  
TTTTTTAACGGAT

SE-B-8:

AGCTTTCATCAACGGATTGACCGTAAAATCGTATAATTTTTTTTTTTTTTTTTTTTTTTT  
TTTTAACGGAT

SE-B-9:

GACAGGAGGTTGAAACAAATAAATCCGCCCCCTCCGCCACCCTTTTTTTTTTTTTTTTTTTT  
TTTTTTAACGGAT

SE-B-10:

CAGAATCAAGTTTCGGCATTTCGGTTAAATATATCACCAGTTTTTTTTTTTTTTTTTTTTTTT  
TTTTAACGGAT

SE-B-11:

TCATATGGTTTACGATTGAGGGAGGGAAACGCAATACATCATTTTTTTTTTTTTTTTTTTTTT  
TTTTTAACGGAT

SE-B-12:

AATAGCAATAGCACCAGAAGGAAACCTAAAGCCACTGGTAATTTTTTTTTTTTTTTTTTTTTT  
TTTTTTAACGGAT

SE-B-13:

TGTAGCATTCCAACGTTAGTAAATGAAGTGCCGCGCCACCCTTTTTTTTTTTTTTTTTTTT  
TTTTTAACGGAT

SE-B-14:

GAAACATGAAAGCTCAGTACCAGGCGAAAAATGCTGAACAAATTTTTTTTTTTTTTTTTT  
TTTTTTAACGGAT

SE-B-15:

AGAGCCTAATTTGATTTTTTGTTTAAATCCTGAAATAAAGAATTTTTTTTTTTTTTTTTTT  
TTTTAACGGAT

SE-B-16:

TTTGCGGAACAATGGCAATTCATCAATCTGTATAATAATTTTTTTTTTTTTTTTTTTTTT  
TTTTAACGGAT

SE-B-17:

TTTGCGGATGGCCAACTAAAGTACGGGCTTGCAGCTACAGAGTTTTTTTTTTTTTTTTTT  
TTTTTTAACGGAT

SE-B-18:

CTTAAACAGCTTATATATTCGGTCGCTTGATGGGGAACAAGATTTTTTTTTTTTTTTTTTT  
TTTTTAACGGAT

SE-B-19:

GGCCCTGAGAGAAGCAGGCGAAAATCATTGCGTAGAGGCGGTTTTTTTTTTTTTTTTTTTT  
TTTTTTAACGGAT

SE-B-20:

GCTCACAATTCCGTGAGCTAACTCACTGGAAGTAATGGTCAATTTTTTTTTTTTTTTTTTTT  
TTTTTAACGGAT

SE-B-21:

CAACGCTCAACAGCAGAGGCATTTTCAATCCAATGATAAATATTTTTTTTTTTTTTTTTTTT  
TTTTTAACGGAT

SE-B-22:

ATCAAATCATATATGTAAATGCTGAACAAACACTTGCTTCTTTTTTTTTTTTTTTTTTTTTT  
TTTTAACGGAT

SE-B-23:

TGATTGCTTTGAGCAAAAGAAGATGAAATAGCAGAGGTTTTGTTTTTTTTTTTTTTTTTT  
TTTTTTAACGGAT

SE-B-24:

AACGGGTATTAAGGAATCATTACCGCCAGTAATTCAACAATTTTTTTTTTTTTTTTTTT  
TTTTTTAACGGAT

**c. Inner strands of regular-octahedral DNA origami frames (ULTRAPAGE purified)**

Inner-1:

ATCCATCACTTCATACTCTACGTTGTTGTTGTTGTTGTTGTAGCGCCATTAAATTGGGAA  
TTAGAGCGCAAGGCGCACCGTAATCAGTAGCGA

Inner-2:

ATCCATCACTTCATACTCTACGTTGTTGTTGTTGTTGTTCCACGCGCAAAATGGTTGA  
GTGTTGTTTCGTGGACTTGCTTTCGAGGTGAATTT

Inner-3:

ATCCATCACTTCATACTCTACGTTGTTGTTGTTGTTGTTAGCCGAAAGTCTCTCTTTTGA  
TGATACAAGTGCCTTAAGAGCAAGAAACAATGA

Inner-4:

ATCCATCACTTCATACTCTACGTTGTTGTTGTTGTTGTTTTAGCGGTACAGAGCGGGAG  
AATTAAGTGCCTAATTTTCGGAACCTATTATTCT

Inner-5:

ATCCATCACTTCATACTCTACGTTGTTGTTGTTGTTGTTGGGGTGCCAGTTGAGACCAT  
TAGATACAATTTTCACTGTGTGAAATTGTTATCC

Inner-6:

ATCCATCACTTCATACTCTACGTTGTTGTTGTTGTTGTTTCAGAGCTGGGTAAACGACG  
GCCAGTGCATCCCCGTAGTAGCATTAAACATCCA

Inner-7:

ATCCATCACTTCATACTCTACGTTGTTGTTGTTGTTGTTGTGGGAAATCATATAAATATTT  
AAATTGAATTTTTGTCTGGCCTTCCTGTAGCC

Inner-8:

ATCCATCACTTCATACTCTACGTTGTTGTTGTTGTTGTTGATTATCAACTTTACA  
AAGGAATCCAAAAAGTTTGAGTAACATTATCAT

**d. Thiolated DNA for AuNPs function (HPLC purified)**

Thiolated-DNA-1: GAAGTGATGGATGAT

**e. Sticky ends of regular-octahedral DNA origami frames-universality verification-1<sup>st</sup> system (ULTRAPAGE purified)**

1<sup>st</sup> system-SE-A-1:

CAAATGCTTTAAAAAATCAGGTCTTTAAGAGCAGCCAGAGGGTTTTTTTTTTTTTTTT  
TTTTTATGTGGTA

1<sup>st</sup> system-SE-A-2:

AAAGATTCATCAGGAATTACGAGGCATGCTCATCCTTATGCGTTTTTTTTTTTTTTTT  
TTTTTATGTGGTA

1<sup>st</sup> system-SE-A-3:

CTTCATCAAGAGAAATCAACGTAACAGAGATTTGTCAATCATTTTTTTTTTTTTTTTT  
TTTTTATGTGGTA

1<sup>st</sup> system-SE-A-4:

AAACGAAAGAGGGCGAAACAAAGTACTGACTATATTCGAGCTTTTTTTTTTTTTTTTT  
TTTTTATGTGGTA

1<sup>st</sup> system-SE-A-5:

GGTAGCTATTTAGAGAATCGATGAAAACATTAATGTGTAGTTTTTTTTTTTTTTTT  
TTTTTATGTGGTA

1<sup>st</sup> system-SE-A-6:

ATAAATCATAATAAATCGGTTGTACTGTGCTGGCATGCCTGTTTTTTTTTTTTTTTT  
TTTTTATGTGGTA

1<sup>st</sup> system-SE-A-7:

ACTGTTGGGAAGCAGCTGGCGAAAGGATAGGTCAAGATCGCATTTTTTTTTTTTTTT  
TTTTTATGTGGTA

1<sup>st</sup> system-SE-A-8:

AGCTTTCATCAACGGATTGACCGTAAAATCGTATAATATTTTTTTTTTTTTTTTTTTTTTTT  
TTTATGTGGTA

1<sup>st</sup> system-SE-A-9:

GACAGGAGGTTGAAACAAATAAATCCGCCCCCTCCGCCACCCTTTTTTTTTTTTTTTTTTTT  
TTTTTATGTGGTA

1<sup>st</sup> system-SE-A-10:

CAGAATCAAGTTTCGGCATTTCGGTTAAATATATCACCAGTTTTTTTTTTTTTTTTTTTTTTT  
TTTATGTGGTA

1<sup>st</sup> system-SE-A-11:

TCATATGGTTTACGATTGAGGGAGGGAAACGCAATACATACATTTTTTTTTTTTTTTTTTTTTT  
TTTTATGTGGTA

1<sup>st</sup> system-SE-A-12:

AATAGCAATAGCACCAGAAGGAAACCTAAAGCCACTGGTAATTTTTTTTTTTTTTTTTTTTTT  
TTTTTATGTGGTA

1<sup>st</sup> system-SE-A-13:

TGTAGCATTCACGTTAGTAAATGAAGTGCCGCGCCACCCTTTTTTTTTTTTTTTTTTTTTTTT  
TTTTATGTGGTA

1<sup>st</sup> system-SE-A-14:

GAAACATGAAAGCTCAGTACCAGGCGAAAAATGCTGAACAAATTTTTTTTTTTTTTTTTTTTTT  
TTTTTATGTGGTA

1<sup>st</sup> system-SE-A-15:

AGAGCCTAATTTGATTTTTTGTTTAAATCCTGAAATAAAGAATTTTTTTTTTTTTTTTTTTTTT  
TTTATGTGGTA

1<sup>st</sup> system-SE-A-16:

TTTGCGGAACAATGGCAATTCATCAATCTGTATAATAATTTTTTTTTTTTTTTTTTTTTTTTTT  
TTTATGTGGTA

1<sup>st</sup> system-SE-A-17:

TTTGCGGATGGCCAACTAAAGTACGGGCTTGCAGCTACAGAGTTTTTTTTTTTTTTTTTTTTTT  
TTTTTATGTGGTA

1<sup>st</sup> system-SE-A-18:

CTTAAACAGCTTATATATTCGGTTCGCTTGATGGGGAACAAGATTTTTTTTTTTTTTTTTTTT  
TTTTATGTGGTA

1<sup>st</sup> system-SE-A-19:

GGCCCTGAGAGAAGCAGGCGAAAATCATTGCGTAGAGGCGGTTTTTTTTTTTTTTTTTTT  
TTTTTATGTGGTA

1<sup>st</sup> system-SE-A-20:

GCTCACAATTCCGTGAGCTAACTCACTGGAAGTAATGGTCAATTTTTTTTTTTTTTTTTTT  
TTTTATGTGGTA

1<sup>st</sup> system-SE-A-21:

CAACGCTCAACAGCAGAGGCATTTTCAATCCAATGATAAATATTTTTTTTTTTTTTTTTTT  
TTTTATGTGGTA

1<sup>st</sup> system-SE-A-22:

ATCAAATCATATATGTAAATGCTGAACAAACACTTGCTTCTTTTTTTTTTTTTTTTTTTTT  
TTTATGTGGTA

1<sup>st</sup> system-SE-A-23:

TGATTGCTTTGAGCAAAGAAGATGAAATAGCAGAGGTTTTGTTTTTTTTTTTTTTTTTTT  
TTTTTATGTGGTA

1<sup>st</sup> system-SE-A-24:

AACGGGTATTAAGGAATCATTACCGCCAGTAATTCAACAATATTTTTTTTTTTTTTTTTTT  
TTTTATGTGGTA

1<sup>st</sup> system-SE-B-1:

CAAATGCTTTAAAAAATCAGGTCTTTAAGAGCAGCCAGAGGGTTTTTTTTTTTTTTTTTT  
TTTTTACCACAT

1<sup>st</sup> system-SE-B-2:

AAAGATTCATCAGGAATTACGAGGCATGCTCATCCTTATGCGTTTTTTTTTTTTTTTTTT  
TTTTTACCACAT

1<sup>st</sup> system-SE-B-3:

CTTCATCAAGAGAAATCAACGTAACAGAGATTTGTCAATCATTTTTTTTTTTTTTTTTTT  
TTTTTACCACAT

1<sup>st</sup> system-SE-B-4:



AAACGAAAGAGGGCGAAACAAAGTACTGACTATATTCGAGCTTTTTTTTTTTTTTTTTTT  
TTTTTTACCACAT

1<sup>st</sup> system-SE-B-5:

GGTAGCTATTTAGAGAATCGATGAAAACATTAAATGTGTAGTTTTTTTTTTTTTTTTTT  
TTTTTACCACAT

1<sup>st</sup> system-SE-B-6:

ATAAATCATAATAAATCGGTTGTACTGTGCTGGCATGCCTGTTTTTTTTTTTTTTTTTT  
TTTTACCACAT

1<sup>st</sup> system-SE-B-7:

ACTGTTGGGAAGCAGCTGGCGAAAGGATAGGTCAAGATCGCATTTTTTTTTTTTTTTTTT  
TTTTTTACCACAT

1<sup>st</sup> system-SE-B-8:

AGCTTTCATCAACGGATTGACCGTAAAATCGTATAATTTTTTTTTTTTTTTTTTTTTTTT  
TTTTACCACAT

1<sup>st</sup> system-SE-B-9:

GACAGGAGGTTGAAACAAATAAATCCGCCCCCTCCGCCACCCTTTTTTTTTTTTTTTTTTT  
TTTTTTACCACAT

1<sup>st</sup> system-SE-B-10:

CAGAATCAAGTTTCGGCATTTCGGTTAAATATATCACCAGTTTTTTTTTTTTTTTTTTTTT  
TTTTACCACAT

1<sup>st</sup> system-SE-B-11:

TCATATGGTTTACGATTGAGGGAGGGAAACGCAATACATTTTTTTTTTTTTTTTTTTTTT  
TTTTTACCACAT

1<sup>st</sup> system-SE-B-12:

AATAGCAATAGCACCAGAAGGAAACCTAAAGCCACTGGTAATTTTTTTTTTTTTTTTTTTTT  
TTTTTTACCACAT

1<sup>st</sup> system-SE-B-13:

TGTAGCATTCCAACGTTAGTAAATGAAGTGCCGCGCCACCCTTTTTTTTTTTTTTTTTTTTT  
TTTTTACCACAT

1<sup>st</sup> system-SE-B-14:

GAAACATGAAAGCTCAGTACCAGGCGAAAAATGCTGAACAAATTTTTTTTTTTTTTTTT  
TTTTTTACCACAT

1<sup>st</sup> system-SE-B-15:

AGAGCCTAATTTGATTTTTTGTAAATCCTGAAATAAAGAATTTTTTTTTTTTTTTTTTT  
TTTTACCACAT

1<sup>st</sup> system-SE-B-16:

TTTGC GGAACAATGGCAATTCATCAATCTGTATAATAATTTTTTTTTTTTTTTTTTTT  
TTTTACCACAT

1<sup>st</sup> system-SE-B-17:

TTTGC GGATGGCCA ACTAAAGTACGGGCTTGCAGCTACAGAGTTTTTTTTTTTTTTTTT  
TTTTTTACCACAT

1<sup>st</sup> system-SE-B-18:

CTTAAACAGCTTATATATTCGGTCGCTTGATGGGGAACAAGATTTTTTTTTTTTTTTTTT  
TTTTTACCACAT

1<sup>st</sup> system-SE-B-19:

GGCCCTGAGAGAAGCAGGCGAAAATCATTGCGTAGAGGCGGTTTTTTTTTTTTTTTTTTT  
TTTTTTACCACAT

1<sup>st</sup> system-SE-B-20:

GCTCACAATTCGGTGAGCTAACTCACTGGAAGTAATGGTCAATTTTTTTTTTTTTTTTTTT  
TTTTTACCACAT

1<sup>st</sup> system-SE-B-21:

CAACGCTCAACAGCAGAGGCATTTTCAATCCAATGATAAATATTTTTTTTTTTTTTTTTTT  
TTTTTACCACAT

1<sup>st</sup> system-SE-B-22:

ATCAAAATCATATATGTAAATGCTGAACAAACACTTGCTTCTTTTTTTTTTTTTTTTTTTT  
TTTTACCACAT

1<sup>st</sup> system-SE-B-23:

TGATTGCTTTGAGCAAAGAAGATGAAATAGCAGAGGTTTTGTTTTTTTTTTTTTTTTTTT  
TTTTTTACCACAT

1<sup>st</sup> system-SE-B-24:



EL-octa-Staple-26: GAAATCGGCCCCCTACGGGGTCAGTGCCCTTTTGATCCAACG  
EL-octa-Staple-27: AACGGGTCCTGAACAAGAAAAATAATATCTTATCATTCCAAG  
EL-octa-Staple-28: AAAAGCCCTCAGGACGTTGGTGTAGATGGGGAACAGGCCTTC  
EL-octa-Staple-29: ATTAAATCAGCTTTCATCAACATTAAATTTGTTAAAATTCGC  
EL-octa-Staple-30: TACATTTAATAGTACATCCAATAAATCAAAGCTAACCAAAAA  
EL-octa-Staple-31: GCCCAATTTTGCCATAACGAGCGTCTTTGCACCCATTAAATC  
EL-octa-Staple-32: ATAGCGAAATTACGTAGGAATACCACATCAGTACAGTACCGT  
EL-octa-Staple-33: GTTGGGATGAAAGAGGACAGATGAACGGAGTAGATCATTAGA  
EL-octa-Staple-34: CTTTTTCAAAGAATACTCATCTTTGACCGCCTGATGAAATCC  
EL-octa-Staple-35: AAGCCTGCGTGCCAGCTGCATTAATGAAAAGCATAAAGTGTA  
EL-octa-Staple-36: TCAGTGATCATCAAGAACTGACCAACTTAGAAAAATCTACGT  
EL-octa-Staple-37: TAACAGTACCCTGTAGCCTCAGAGCATATACAGGCGCATCAA  
EL-octa-Staple-38: CTAATGCGAATATAAGAATCGCCATATTTACCGCACTCATCG  
EL-octa-Staple-39: ATAGCTGTTGCCCCCGGGCAACAGCTGAATTGGGCGTCGGGA  
EL-octa-Staple-40: GCCGCCATGTAGCGGGAAGGGAAGAAAGAGAGCTTTCTGAAT  
EL-octa-Staple-41: GGAATTAATGGA ACTACCATATCAAAAACGTCAGAGTAACAG  
EL-octa-Staple-42: TCTGAATTCATCATTATCATTGCGGTAATACATGAATGG  
EL-octa-Staple-43: AGAGGCAATGAGGAAGGGTAGCAACGGCAGGTGTCAAATTCC  
EL-octa-Staple-44: CGTTCTATAGGTAATTTTAGAACCCCTCAAGGATGAACGGTAA  
EL-octa-Staple-45: TTCTACTCGCAAATCAATTCTGCGAACGTGTTGTAATCGGTA  
EL-octa-Staple-46: AGGAAAACCAGCAGACTGATAGCCCTAAACAATATAGATAGA  
EL-octa-Staple-47: GAGCCGGTCGTAAGAAAGCGGCCAACGCTGATCGTGCTCAAG  
EL-octa-Staple-48: AAACAGGAGATAACCCACAAGAATTGAGAGAGAATAACATAA  
EL-octa-Staple-49: GTGCATCACAACCCGTCGGATTCTCCGTGGCGCATCGTAACC  
EL-octa-Staple-50: CTAAAGTAGGCCGCACAATGACAACA ACTGAATTTAAATCTC  
EL-octa-Staple-51: AATCCAACAAAAGAAAGTAAGCAGATAGAATAGCACGCTAAT  
EL-octa-Staple-52: TAACGTGAGAATCCGTGAGTGAATAACCACATAGCGATAGCT  
EL-octa-Staple-53: GGATTATTGACCTGAATACGTGGCACAGAACATCGTACCGAA  
EL-octa-Staple-54: GTACGCCCTTTCCTTACAGGGCGCGTACAGAGTCAATAGTGA  
EL-octa-Staple-55: ATCATTTGAAAGGAGCGGGAATAGCCCGCGAAAAAGCGTCA

EL-octa-Staple-56: TTAATTGATATAATGCTGTGGAAGCCCGATTAGAGAAGGCGA  
EL-octa-Staple-57: ATCATAAACGAACTATGCGATTTTAAGAATGGTTTTGCTCAT  
EL-octa-Staple-58: AAGCATCGAGGAAGATATCTTTAGGAGCGAAGTATAAAACAAT  
EL-octa-Staple-59: AAAGTATTCAAAAAGTCATAAATATTCAAAATGTTATCACCG  
EL-octa-Staple-60: GCAAGGAACTAGCAGAGAGTCTGGAGCATTTTTGAATTCAAC  
EL-octa-Staple-61: ATCAGAGGAAGCGCACGATTTTTTGTTCACGCAATAATAACG  
EL-octa-Staple-62: CACCATTACCACCCGCCTCCCTCAGAGCTAATCAAGCATTTT  
EL-octa-Staple-63: TTTGCTAAAAGCGTTTATTTTGTATCGGATACCATATGAAAT  
EL-octa-Staple-64: TAATGTGGCTGATAAATTATGCTATTTTCCGCAATGCCTGAG  
EL-octa-Staple-65: TAGATTAATATATTGAGAAGTGTTTTTTGGACGAGCACGTA  
EL-octa-Staple-66: CGAGGAAAACGTCAAAAATGAAAATAGCTACAGAGCTAAAGA  
EL-octa-Staple-67: ATGTTAGTTATACACCGGAATCATAATTGACCGTGAATTCAT  
EL-octa-Staple-68: CAAAAGGGAGGCTTGCCACCCTCAGAACAACCCATAACTACA  
EL-octa-Staple-69: AAGATTAGTATTCTAAATCAGATATAGATATATTTTAAATAG  
EL-octa-Staple-70: AACCGATTTTATCAGCTTGCTTTCGAGGCATCGCCCACGCAT  
EL-octa-Staple-71: CAAAAAACGGAGTGTCTTTCCAGACGTTCTGAGGCTTGCAGG  
EL-octa-Staple-72: TCGGTTCGAGTAAATGAATTTTCTGTATGGTCACCACGATAGC  
EL-octa-Staple-73: CAGACCAAATTAAGTAGCCACCAGAACGGTTGACTTAGTAC  
EL-octa-Staple-74: CAGAGGCAAAGAACGGGTTTAGATAAGTATAACCAGAAACCTA  
EL-octa-Staple-75: GTTTCAGAAGGCTCCAAAAGGAGCCTTTAACAACCTTCAACA  
EL-octa-Staple-76: AACCTGTGGGTGCCTGTGAAATTGTTATCAGCAAGCGGTCCA  
EL-octa-Staple-77: CAGAAGGAATAAGAGCAAGAAACAATGACCGAACAAAGTTAC  
EL-octa-Staple-78: TTTACAGTTAAAACACACTAAGCCCAATAAGAGGAGCTTTAC  
EL-octa-Staple-79: GTAGGGCGCAAGCCATCGGCTGTCTTTCCCATCCTGTTTACG  
EL-octa-Staple-80: AAGTTTGTACATCGATTTTCAGGTTTAATTATTTGTTATACT  
EL-octa-Staple-81: ACTTGCCATAATCAACAGTACATAAATCAGATTTCTATTAC  
EL-octa-Staple-82: TAATATTGTCTAAAGTTATGAGCGAGTATGATGAAAGCAACC  
EL-octa-Staple-83: ATGGTTTACATATAAGAAAATACATACAAACTGTTTAGTATC  
EL-octa-Staple-84: CGGTCATTAATCAGGCAAGGCCGGAACGGAACCGCTCAGAT  
EL-octa-Staple-85: ACCCTTCTTACATTTGGAATACCTACAATAAAAACCATAC

EL-octa-Staple-86: CAGTTCAGAGAAGGATTAGTTTCGTCACTCAACTAATAACGC  
 EL-octa-Staple-87: GGTCAGGAAAGACTATCAAAAAGATTAACACCTGCAGGTCGA  
 EL-octa-Staple-88: TGAGCAAAATGGAAGTGAGGCCACCGAGTTAGTAACTATCGG  
 EL-octa-Staple-89: AGAGTTGCCGCTCACAATCCACACAACCTTTTGACCTGAAAT  
 EL-octa-Staple-90: AGCACCGAGCCCCCTTGCCATCTTTTCACGCCACCCACCCT  
 EL-octa-Staple-91: CTTTTTTAAGAAGACAAAATCGCGCAGAACTCAAATAACATC  
 EL-octa-Staple-92: AGGAATTACCTTGCAGTGCCACGCTGAGACTTTACTAGACGT  
 EL-octa-Staple-93: CCAGTCAGAGTAGTAAATTGGGCTTGAGACTGGCTCATTATA  
 EL-octa-Staple-94: GCAAAGCGGATCCCACGACGGCCAGTGCGGGTAACTCCAACA  
 EL-octa-Staple-95: AACACTGCAGAACCTTGCAAAAAGAAGTTTAGATACATGCAAA  
 EL-octa-Staple-96: CCACCCTAGGATTAGCGGGGTTTTGCTCGAGGTTTAGGGGGT  
 EL-octa-Staple-97: GCTGAGATATGGTTGCTTTAGTAGAAGAGGCGAATAATTACC  
 EL-octa-Staple-98: AGTTTGAAAGCAAATATTTAAATTGTAAAGCCAGCAAATCTA  
 EL-octa-Staple-99: GCTTAATAAAATCATAGAATCCTTGAAATTGCTTCAGGAACG  
 EL-octa-Staple-100: TCAAAGGGAGATAGCCCTTATAAATCAAAGGCCCGTATAAAC  
 EL-octa-Staple-101: TTCTGGTATGCAACAGCTTAATTGCTGACTCCTTTGGCGAAA  
 EL-octa-Staple-102: AATAAGAAGAACGCGCCTGTTTATCAACATTTTCGAGCCAGT  
 EL-octa-Staple-103: CTTAGGTGAGCCATGACGGAAATTATTCGCGACATCATCTTC  
 EL-octa-Staple-104: AAATACCACTAGAAAAAGCTGCTGATGCAATTTAACCAAAGA  
 EL-octa-Staple-105: TGAATACGGTAATACAATACTTCTTTGATAAAAGAGAATTAC  
 EL-octa-Staple-106: TGACCTAAAATCCATATAACTATATGTATATTATCACCGTCA  
 EL-octa-Staple-107: CTGTAGCTTTTGTTCAGGAAGATTGTATGGGGACGACGACAG  
 EL-octa-Staple-108: GGGGGATCAGGCTGACCAGGCAAAGCGCGAAGCTCAACATGT  
 EL-octa-Staple-109: ACACCGCCTCGTATCATTTGAGGATTTAACTAACAAGTTGAA  
 EL-octa-Staple-110: CTGGCCCGCGGGGAGAGGCGGTTTTGCGTTTGCCCTTCACCGC  
 EL-octa-Staple-111: TACTCAGAGTACCACTGAGACTCCTCAAGAAAACGAGAATGA  
 EL-octa-Staple-112: AATAGTATTGAATCCCCCTCAAATGCTTTTGCCAGAGTACCG  
 EL-octa-Staple-113: CAAAAGGATTAAGGTGAAAAGGTGGCAACCAGCGTGGGTTTG  
 EL-octa-Staple-114: TTACCGTTTGGCCTCAGGAGGTTGAGGCAAGCGCTAGGGCGC  
 EL-octa-Staple-115: TACATGGTTGAGTAACAGTGTGACGACGATCCAGTAACCGTCT

EL-octa-Staple-116: TTAAGTTCAAGCTTGCATGTTTCGCCATTGTGCTGCAGTACCT  
EL-octa-Staple-117: TTATCCGGTATGCCGGAGAGGGTAGCTAAACAAGAGAATCGC  
EL-octa-Staple-118: CTGACCTATAAGGCTTGCCCTGACGAGAGGCGCATAGGCTGG  
EL-octa-Staple-119: AACCAAGTAACAACGCCAACATGTAATTAACAAAGAAGGAGC  
EL-octa-Staple-120: CATCAGTTAGCATTGCAAGCCCAATAGGCGCCACCAACCAA  
EL-octa-Staple-121:  
GAATACCATAAGAAATTAGACGGGAGAAAATTGAGATAGCTATCTTACCGAAGC  
EL-octa-Staple-122:  
GCGACCTCGGAACGAGTTTCCATTAAACCAACCTAATTATACCAAGCGCGAAAC  
EL-octa-Staple-123:  
TATCGGCCCAAAAAAAAAATCAGCTCATTTCGCGTCTAACGGCGGATTGACCGTAA  
EL-octa-Staple-124:  
CATTATGTGATTCCGGTCAATAACCTGTAAAGGTGAAGGCAAAGAATTAGCAA  
EL-octa-Staple-125:  
AGAACAATTAATTGAAGTACCGACAAAAACAACATAATTTACGAGCATGTAGA  
EL-octa-Staple-126:  
ACGCCTGTGAGATTAGGCATAGTAAGAGCGATAAACTCAGAGCCACCACCCTCA  
EL-octa-Staple-127:  
CGCTGGTTTTCTGTAAATGAGTGAGCTACTTCCAGCCAGGGTGGTTTTTCTTT  
EL-octa-Staple-128:  
CGAACCAACGCTCAGGCAGATTCACCAGCCAACAGTTTTGAATGGCTATTAGTC  
EL-octa-Staple-129:  
TAATAAAGGGAACCGAGTAATCTTGACAACAAAGCAATTTCAACTTTAATCATT  
EL-octa-Staple-130:  
CCTTGCTCAAGTTATGATGAAACAAACATTCATTTGTCTGTCCATCACGCAAAT  
EL-octa-Staple-131:  
GAGTTAATTTGTCGAGAATAGAAAGGAAACGTTGACTTAAACAGCTTGATACCG  
EL-octa-Staple-132:  
TCGACAACCTGCAACTGAACCTCAAATATAATCAACACTAATAGATTAGAGCCGT  
EL-octa-Staple-133:

CAGAGCCACCATTATAGCGACAGAATCATTATCGAATCACCGGAACCAGAGCC

EL-octa-Staple-134:

TACCTTTAGTAACAATTCTGATTATCAGTTTGGACACGTAAAACAGAAATAAA

EL-octa-Staple-135:

ATTTATCGCGCCGCGTTAGAATCAGAGTTTAGACTGTAAATCGTCGCTATTAA

EL-octa-Staple-136:

CCATAAATAAGAGGGGCGGATAAGTGCCTAGGTGTTAGACTGGATAGCGTCCAA

**g. Inner strands of elongated-octahedral DNA origami frames-universality verification-2<sup>nd</sup> system (ULTRAPAGE purified)**

EL-octa-inner-1:

ATCCATCACTTCATACTCTACGTTGTTGTTGTTGTTGTTAGCCTAAAGCAAGCAAGAAC

GCGAGGCGTGAAGCCGCTACAATTTTATCCTGAA

EL-octa-inner-2:

ATCCATCACTTCATACTCTACGTTGTTGTTGTTGTTGTTTCGTAAATAAAAATAGATTCA

AAAGGGTATATGATGAGATCTACAAAGGCTATC

EL-octa-inner-3:

ATCCATCACTTCATACTCTACGTTGTTGTTGTTGTTGTTATATGCGCAAACGTAAAGAA

ACGCAAAGAATAGAATGATAAATAAGGCGTTAAA

EL-octa-inner-4:

ATCCATCACTTCATACTCTACGTTGTTGTTGTTGTTGTTCCGACTTTGGGTTAATCGCAA

GACAAAGTTAATTTCAACCGATTGAGGGAGGG

EL-octa-inner-5:

ATCCATCACTTCATACTCTACGTTGTTGTTGTTGTTGTTAGTTAATGCAAAAATGGTTGAG

TGTTGTTTCGTGGACTGATACAGGAGTGTACTGG

EL-octa-inner-6:

ATCCATCACTTCATACTCTACGTTGTTGTTGTTGTTGTTTGGCAAGGCATTGATGATATT

CACAAACCGCAGTCGACGGGGAAAGCCGGCGAA

EL-octa-inner-7:

ATCCATCACTTCATACTCTACGTTGTTGTTGTTGTTGTTCTCTAGAGGATTGCTCAAATA



TCGCGTTAGCAAACGCCAGGGTTTTCCCAGTCA

EL-octa-inner-8:

ATCCATCACTTCATACTCTACGTTGTTGTTGTTGTTGTTTTAAATGCCGGAACGCAACT  
GTTGGGAGCCAGCTTGATAAGAGGTCATTTTTG

**h. Sticky ends of elongated-octahedral DNA origami frames-universality verification-2<sup>nd</sup> system (ULTRAPAGE purified)**

EL-octa-SE-A-1:

AAAGTACAACGGGTTACTTAGCCGGACTCAGCAATACGTAATTTTTTTTTTTTTTTTTTTT  
TTTTATCCGTTA

EL-octa-SE-A-2:

ATAGTTGCGCCGTTTTGCGGGATCGTGTTAGCGAGGAATTGCTTTTTTTTTTTTTTTTTT  
TTTTATCCGTTA

EL-octa-SE-A-3:

GTGAATTACCTTAACGGAACAACATTGGCGCAGGATATTCATTTTTTTTTTTTTTTTTT  
TTTTATCCGTTA

EL-octa-SE-A-4:

TTTTCAGGGATACCACAGACAGCCCTCAGGTAGATCATAACCTTTTTTTTTTTTTTTTTT  
TTTTATCCGTTA

EL-octa-SE-A-5:

AGGTCATTGCCTTGTCATCATATGTGCCTTAGCCGGAGACTTTTTTTTTTTTTTTTTT  
TTTTCATCAAGT

EL-octa-SE-A-6:

TGGGATAGGTCAAGATCGCACTCCAGCGGTTGAAATAGGAACTTTTTTTTTTTTTTTTTT  
TTTTTCATCAAGT

EL-octa-SE-A-7:

ATTAAGCAATAAAATACTTTTGCGGGAGTTTCATATTTTCATTTTTTTTTTTTTTTTTT  
TTTCATCAAGT

EL-octa-SE-A-8:

CGGATGGCTTAGTAAAGTACGGTGTCCCTTCCGTCGGTGCGGTTTTTTTTTTTTTTTTT

TTTTCATCAAGT

EL-octa-SE-A-9:

TCACCAGTGAGAAGCAGGCGAAAATCTCGTAATTTAATTGCGTTTTTTTTTTTTTTTTTTT

TTTTCATCAAGT

EL-octa-SE-A-10:

TAATAAGTTTTAGCCTATTTTCGGAACCTTGATGGGGAACAAGATTTTTTTTTTTTTTTTTTT

TTTTCATCAAGT

EL-octa-SE-A-11:

CGACGTTGTAAACGGGTACCGAGCTCTATTATAGAGCTTCAATTTTTTTTTTTTTTTTTTT

TTTTCATCAAGT

EL-octa-SE-A-12:

TACTGCGGAATCTCAGGTCTTTACCCTATTCTGGGGTTGATATTTTTTTTTTTTTTTTTTT

TTTCATCAAGT

EL-octa-SE-A-13:

TTAATTTCCCTTAGGTCTGAGAGACACCACACTAAACAGGATTTTTTTTTTTTTTTTTTTT

TTTTCATCAAGT

EL-octa-SE-A-14:

ACCACCGGAACCTCAGAGCCGCCACCAAATCACTTTAGCGTTTTTTTTTTTTTTTTTTTT

TTTTTCATCAAGT

EL-octa-SE-A-15:

AAGGTAAATATTTTGGGAATTAGAGCTTTTTAAGAAAACCTTTTTTTTTTTTTTTTTTTTT

TTTCATCAAGT

EL-octa-SE-A-16:

CGTGGCGAGAAAGTCACGCTGCGCGTCCACCACTCCTCATTATTTTTTTTTTTTTTTTTTT

TTTTCATCAAGT

EL-octa-SE-A-17:

CCTTTTTAAGAACTGGCATGATTAAATATTATAACACCCTGTTTTTTTTTTTTTTTTTTTT

TTTCATCAAGT

EL-octa-SE-A-18:

TCTTACCAACGCGTTACAAAATAAACGGAATCAGAACCTCCCTTTTTTTTTTTTTTTTTTTT

TTTTCATCAAGT

EL-octa-SE-A-19:

AACCAATCAATAGTTTTTATTTTCATGCCAACGTAATCTGTTTTTTTTTTTTTTTTTTTT

TTTTCATCAAGT

EL-octa-SE-A-20:

TAAGAATAAACAAATTCTTACCAGTACCTTATTGGAATAAGTTTTTTTTTTTTTTTTTTTT

TTTTCATCAAGT

EL-octa-SE-A-21:

CAATAGATAATATAAATCCTTTGCCCGGCGGTCTCAATCAATTTTTTTTTTTTTTTTTTTTT

TTTATCCGTTA

EL-octa-SE-A-22:

TTTAATGCGCGAAAGATAAAACAGAGCCAGCCAACCAGTAATTTTTTTTTTTTTTTTTTTTT

TTTTTATCCGTTA

EL-octa-SE-A-23:

TAACCGTTGTAGTCCAGAACAATATTCGCCTGAACAAAATTTTTTTTTTTTTTTTTTTTT

TTTTTATCCGTTA

EL-octa-SE-A-24:

GAAATTGCGTAGGGAGAAACAATAACGTTATTAGCAATTCATTTTTTTTTTTTTTTTTTTTT

TTTTTATCCGTTA

EL-octa-SE-B-1:

AAAGTACAACGGGTTACTTAGCCGGACTCAGCAATACGTAATTTTTTTTTTTTTTTTTTTTT

TTTTTAACGGAT

EL-octa-SE-B-2:

ATAGTTGCGCCGTTTTGCGGGATCGTGTTAGCGAGGAATTGCTTTTTTTTTTTTTTTTTTTTT

TTTTTAACGGAT

EL-octa-SE-B-3:

GTGAATTACCTTAACGGAACAACATTGGCGCAGGATATTCATTTTTTTTTTTTTTTTTTTTT

TTTTTAACGGAT

EL-octa-SE-B-4:

TTTTTCAGGGATACCACAGACAGCCCTCAGGTAGATCATAACCTTTTTTTTTTTTTTTTTTTTT

TTTTTAACGGAT

EL-octa-SE-B-5:

AGGTCATTGCCTTGTCAATCATATGTGCCTTAGCCGGAGACTTTTTTTTTTTTTTTTTT

TTTTACTTGATG

EL-octa-SE-B-6:

TGGGATAGGTCAAGATCGCACTCCAGCGGTTGAAATAGGAACTTTTTTTTTTTTTTTTTT

TTTTTACTTGATG

EL-octa-SE-B-7:

ATTAAGCAATAAAATACTTTTGCGGGAGTTTCATATTTTCATTTTTTTTTTTTTTTTTT

TTTACTTGATG

EL-octa-SE-B-8:

CGGATGGCTTAGTAAAGTACGGTGTCCCTTCCGTCGGTGCGGTTTTTTTTTTTTTTTTT

TTTTACTTGATG

EL-octa-SE-B-9:

TCACCAGTGAGAAGCAGGCGAAAATCTCGTAATTTAATTGCGTTTTTTTTTTTTTTTTT

TTTTACTTGATG

EL-octa-SE-B-10:

TAATAAGTTTTAGCCTATTTTCGGAACCTTGATGGGGAACAAGATTTTTTTTTTTTTTTTTT

TTTTACTTGATG

EL-octa-SE-B-11:

CGACGTTGTAAACGGGTACCGAGCTCTATTATAGAGCTTCAATTTTTTTTTTTTTTTTTT

TTTTACTTGATG

EL-octa-SE-B-12:

TACTGCGGAATCTCAGGTCTTACCCTATTCTGGGGTTGATATTTTTTTTTTTTTTTTTT

TTTACTTGATG

EL-octa-SE-B-13:

TTAATTTTCCCTTAGGTCTGAGAGACACCACACTAAACAGGATTTTTTTTTTTTTTTTTT

TTTTACTTGATG

EL-octa-SE-B-14:

ACCACCGGAACCTCAGAGCCGCCACAAAATCACTTAGCGTTTTTTTTTTTTTTTTT

TTTTACTTGATG

EL-octa-SE-B-15:

AAGGTAAATATTTTGGGAATTAGAGCTTTTTAAGAAAACCTTTTTTTTTTTTTTTTTTTT

TTTTACTTGATG

EL-octa-SE-B-16:

CGTGGCGAGAAAGTCACGCTGCGCGTCCACCACTCCTCATTATTTTTTTTTTTTTTTTTT

TTTTACTTGATG

EL-octa-SE-B-17:

CCTTTTTAAGAACTGGCATGATTAAATATTATAACACCCTGTTTTTTTTTTTTTTTTTT

TTTACTTGATG

EL-octa-SE-B-18:

TCTTACCAACGCGTTACAAAATAAACGGAATCAGAACCTCCCTTTTTTTTTTTTTTTTTT

TTTTACTTGATG

EL-octa-SE-B-19:

AACCAATCAATAGTTTTTATTTTCATGCCAACGTAATCTGTTTTTTTTTTTTTTTTTTT

TTTACTTGATG

EL-octa-SE-B-20:

TAAGAATAAACAAATTCTTACCAGTACCTTATTGGAATAAGTTTTTTTTTTTTTTTTTTT

TTTACTTGATG

EL-octa-SE-B-21:

CAATAGATAATATAAATCCTTTGCCCGCGGTCTCAATCAATTTTTTTTTTTTTTTTTTTT

TTTTAACGGAT

EL-octa-SE-B-22:

TTTAATGCGCGAAAGATAAAACAGAGCCAGCCAACCAGTAATTTTTTTTTTTTTTTTTTT

TTTTTTAACGGAT

EL-octa-SE-B-23:

TAACCGTTGTAGTCCAGAACAATATTCGCCTGAACAAAATTTTTTTTTTTTTTTTTTTT

TTTTTAACGGAT

EL-octa-SE-B-24:

GAAATTGCGTAGGGAGAAACAATAACGTTATTAGCAATTCATTTTTTTTTTTTTTTTTTTT

TTTTTAACGGAT

**i. Sticky ends with hairpin DNA conformation of regular-octahedral DNA origami frames-  
universality verification-3<sup>rd</sup> system (ULTRAPAGE purified)**

R-Octa-SE-hairpin-XY-A-1:

GGTAGCTATTTTAGAGAATCGATGAAAACATTAAATGTGTAGTTTACTCTTTTTTTAGAG  
GTTTTTATCCGTTA

R-Octa-SE-hairpin-XY-A-2:

ATAAATCATAATAAATCGGTTGTACTGTGCTGGCATGCCTGTTTTACTCTTTTTTTAGAG  
GTTTTTATCCGTTA

R-Octa-SE-hairpin-XY-A-3:

ACTGTTGGGAAGCAGCTGGCGAAAGGATAGGTCAAGATCGCATTTTACTCTTTTTTTA  
GAGTTTTTATCCGTTA

R-Octa-SE-hairpin-XY-A-4:

AGCTTTCATCAACGGATTGACCGTAAAATCGTATAATTTTTTTTACTCTTTTTTTAGAG  
GTTTTTATCCGTTA

R-Octa-SE-hairpin-XY-A-5:

GACAGGAGGTTGAAACAAATAAATCCGCCCCCTCCGCCACCCTTTTACTCTTTTTTTAG  
AGTTTTTATCCGTTA

R-Octa-SE-hairpin-XY-A-6:

CAGAATCAAGTTTCGGCATTTCGGTTAAATATATCACCAGTTTTTACTCTTTTTTTAGAG  
GTTTTTATCCGTTA

R-Octa-SE-hairpin-XY-A-7:

TCATATGGTTTACGATTGAGGGAGGGAAACGCAATACATACATTTTACTCTTTTTTTAGAG  
GTTTTTATCCGTTA

R-Octa-SE-hairpin-XY-A-8:

AATAGCAATAGCACCAGAAGGAAACCTAAAGCCACTGGTAATTTTTACTCTTTTTTTAG  
AGTTTTTATCCGTTA

R-Octa-SE-hairpin-XY-A-9:

TGTAGCATTCCAACGTTAGTAAATGAAGTGCCGCGCCACCCTTTTTACTCTTTTTTTAG

AGTTTTTATCCGTTA

R-Octa-SE-hairpin-XY-A-10:

GAAACATGAAAGCTCAGTACCAGGCGAAAAATGCTGAACAAATTTACTCTTTTTTTA  
GAGTTTTTATCCGTTA

R-Octa-SE-hairpin-XY-A-11:

AGAGCCTAATTTGATTTTTTGTAAATCCTGAAATAAAGAATTTACTCTTTTTTTAGA  
GTTTTTATCCGTTA

R-Octa-SE-hairpin-XY-A-12:

TTTGCGGAACAATGGCAATTCATCAATCTGTATAATAATTTTTTTACTCTTTTTTTAGA  
GTTTTTATCCGTTA

R-Octa-SE-hairpin-XY-A-13:

TTTGCGGATGGCCAACTAAAGTACGGGCTTGCAGCTACAGAGTTTACTCTTTTTTTAG  
AGTTTTTATCCGTTA

R-Octa-SE-hairpin-XY-A-14:

CTTAAACAGCTTATATATTCGGTCGCTTGATGGGGAACAAGATTTACTCTTTTTTTAGA  
GTTTTTATCCGTTA

R-Octa-SE-hairpin-XY-A-15:

GGCCCTGAGAGAAGCAGGCGAAAATCATTGCGTAGAGGCGGTTTTTACTCTTTTTTTA  
GAGTTTTTATCCGTTA

R-Octa-SE-hairpin-XY-A-16:

GCTCACAATTCCGTGAGCTAACTCACTGGAAGTAATGGTCAATTTACTCTTTTTTTAG  
AGTTTTTATCCGTTA

R-Octa-SE-hairpin-Z-A-1:

CAAATGCTTTAAAAAATCAGGTCTTTAAGAGCAGCCAGAGGGTTCCGAGTCAATTAAG  
ACTCCCTTGATTGGTCA

R-Octa-SE-hairpin-Z-A-2:

AAAGATTCATCAGGAATTACGAGGCATGCTCATCCTTATGCGTTCCGAGTCAATTAAGA  
CTCCCTTGATTGGTCA

R-Octa-SE-hairpin-Z-A-3:

CTTCATCAAGAGAAATCAACGTAACAGAGATTTGTCAATCATTCCGAGTCAATTAAG

ACTCCCTTGTATTGGTCA

R-Octa-SE-hairpin-Z-A-4:

AAACGAAAGAGGGCGAAACAAAGTACTGACTATATTCGAGCTTCCGAGTCAATTAA  
GACTCCCTTGTATTGGTCA

R-Octa-SE-hairpin-Z-A-5:

CAACGCTCAACAGCAGAGGCATTTTCAATCCAATGATAAATATTCGAGTCAATTAAG  
ACTCCCTTGTATTGGTCA

R-Octa-SE-hairpin-Z-A-6:

ATCAAATCATATATGTAAATGCTGAACAAACACTTGCTTCTTCCGAGTCAATTAAGA  
CTCCCTTGTATTGGTCA

R-Octa-SE-hairpin-Z-A-7:

TGATTGCTTTGAGCAAAGAAGATGAAATAGCAGAGGTTTTGTTCCGAGTCAATTAAG  
ACTCCCTTGTATTGGTCA

R-Octa-SE-hairpin-Z-A-8:

AACGGGTATTAAGGAATCATTACCGCCAGTAATTCAACAATATTCGAGTCAATTAAGA  
CTCCCTTGTATTGGTCA

R-Octa-SE-hairpin-XY-B-1:

GGTAGCTATTTAGAGAATCGATGAAAACATTAATGTGTAGTTTTAGCTATTTTTTTAG  
CTTTTTTAACGGAT

R-Octa-SE-hairpin-XY-B-2:

ATAAATCATAATAATCGGTTGTACTGTGCTGGCATGCCTGTTTTAGCTATTTTTTTAG  
CTTTTTTAACGGAT

R-Octa-SE-hairpin-XY-B-3:

ACTGTTGGGAAGCAGCTGGCGAAAGGATAGGTCAAGATCGCATTTTAGCTATTTTTTTA  
GTTTTTTAACGGAT

R-Octa-SE-hairpin-XY-B-4:

AGCTTTCATCAACGGATTGACCGTAAAATCGTATAATTTTTTTTAGCTATTTTTTTAGC  
TTTTTTAACGGAT

R-Octa-SE-hairpin-XY-B-5:

GACAGGAGGTTGAAACAAATAAATCCGCCCCCTCCGCCACCCTTTTAGCTATTTTTTTA



GCTTTTTTAACGGAT

R-Octa-SE-hairpin-XY-B-6:

CAGAATCAAGTTTCGGCATTTCGGTTAAATATATCACCAGTTTTAGCTATTTTTTTAG  
CTTTTTTAACGGAT

R-Octa-SE-hairpin-XY-B-7:

TCATATGGTTTACGATTGAGGGAGGGAAACGCAATACATACATTTTAGCTATTTTTTTAG  
CTTTTTTAACGGAT

R-Octa-SE-hairpin-XY-B-8:

AATAGCAATAGCACCAGAAGGAAACCTAAAGCCACTGGTAATTTTTAGCTATTTTTTTA  
GCTTTTTTAACGGAT

R-Octa-SE-hairpin-XY-B-9:

TGTAGCATTCCAACGTTAGTAAATGAAGTGCCGCGCCACCCTTTTTAGCTATTTTTTTA  
GCTTTTTTAACGGAT

R-Octa-SE-hairpin-XY-B-10:

GAAACATGAAAGCTCAGTACCAGGCGAAAAATGCTGAACAAATTTTAGCTATTTTTTTT  
AGCTTTTTTAACGGAT

R-Octa-SE-hairpin-XY-B-11:

AGAGCCTAATTTGATTTTTTGTTTAAATCCTGAAATAAAGAATTTTAGCTATTTTTTTAG  
CTTTTTTAACGGAT

R-Octa-SE-hairpin-XY-B-12:

TTTGCGGAACAATGGCAATTCATCAATCTGTATAATAATTTTTTTTAGCTATTTTTTTAGC  
TTTTTTAACGGAT

R-Octa-SE-hairpin-XY-B-13:

TTTGCGGATGGCCAATAAAGTACGGGCTTGCAGCTACAGAGTTTTAGCTATTTTTTTA  
GCTTTTTTAACGGAT

R-Octa-SE-hairpin-XY-B-14:

CTTAAACAGCTTATATATTCGGTCGCTTGATGGGGAACAAGATTTTAGCTATTTTTTTAG  
CTTTTTTAACGGAT

R-Octa-SE-hairpin-XY-B-15:

GGCCCTGAGAGAAGCAGGCGAAAATCATTGCGTAGAGGCGGTTTTTAGCTATTTTTTTT

AGCTTTTTTAACGGAT

R-Octa-SE-hairpin-XY-B-16:

GCTCACAAATCCGTGAGCTAACTCACTGGAAGTAATGGTCAATTTTAGCTATTTTTTTA  
GCTTTTTTAACGGAT

R-Octa-SE-hairpin-Z-B-1:

CAAATGCTTTAAAAAATCAGGTCTTTAAGAGCAGCCAGAGGGTTTTGGATGTTTTTTC  
ATCCCCCTGACCAATAC

R-Octa-SE-hairpin-Z-B-2:

AAAGATTCATCAGGAATTACGAGGCATGCTCATCCTTATGCGTTTTGGATGTTTTTTCAT  
CCCCCTGACCAATAC

R-Octa-SE-hairpin-Z-B-3:

CTTCATCAAGAGAAATCAACGTAACAGAGATTTGTCAATCATTTTTGGATGTTTTTTC  
TCCCCCTGACCAATAC

R-Octa-SE-hairpin-Z-B-4:

AAACGAAAGAGGGCGAAACAAAGTACTGACTATATTCGAGCTTTTTGGATGTTTTTTC  
ATCCCCCTGACCAATAC

R-Octa-SE-hairpin-Z-B-5:

CAACGCTCAACAGCAGAGGCATTTTCAATCCAATGATAAATTTTTGGATGTTTTTTC  
TCCCCCTGACCAATAC

R-Octa-SE-hairpin-Z-B-6:

ATCAAATCATATATGTAAATGCTGAACAAACACTTGCTTCTTTTTGGATGTTTTTTCAT  
CCCCCTGACCAATAC

R-Octa-SE-hairpin-Z-B-7:

TGATTGCTTTGAGCAAAGAAGATGAAATAGCAGAGGTTTTGTTTTGGATGTTTTTTC  
TCCCCCTGACCAATAC

R-Octa-SE-hairpin-Z-B-8:

AACGGGTATTAAGGAATCATTACCGCCAGTAATTCAACAATTTTTGGATGTTTTTTCAT  
CCCCCTGACCAATAC

## Section 6. Supplementary References

1. Y. Tian, J. R. Lhermitte, L. Bai, T. Vo, H. L. Xin, H. Li, R. Li, M. Fukuto, K. G. Yager, J. S. Kahn, Y. Xiong, B. Minevich, S. K. Kumar and O. Gang, Ordered three-dimensional nanomaterials using DNA-prescribed and valence-controlled material voxels, *Nature Materials*, 2020, **19**, 789-796.
2. Y. Wang, L. Dai, Z. Ding, M. Ji, J. Liu, H. Xing, X. Liu, Y. Ke, C. Fan, P. Wang and Y. Tian, DNA origami single crystals with Wulff shapes, *Nature Communications*, 2021, **12**, 3011.
